# Supplementary material for: Copper-catalyzed oxidative cyclization of glycine derivatives toward 2-substituted benzoxazoles
Source: Royal Society of Chemistry journal article supplement (doi:10.1039/d0ob02490b), 2021-01-01

# Copper-Catalyzed Oxidative Cyclization of Glycine Derivatives for Synthesis of 2-Substituted Benzoxazoles

Shan Liu<sup>a</sup>, Zhi-Qiang Zhu<sup>a,\*</sup>, Zhi-Yu Hu<sup>a</sup>, Juan Tang<sup>b</sup>, En Yuan<sup>c</sup>

<sup>a</sup> Jiangxi Province Key Laboratory of Synthetic chemistry, School of Chemistry, Biology and Material Science, East China University of Technology, Nanchang 330013, China

<sup>b</sup> Ministry of Education Key Laboratory of Functional Small Organic Molecule, Department of Chemistry and chemical engineering, Jiangxi Normal University, Nanchang 330022, China

<sup>c</sup> College of Pharmacy, Jiangxi University of Traditional Chinese Medicine, Nanchang, 330004, China

\*E-mail: zhuzq@ecut.edu.cn

## Supporting Information

Contents:

|                                                                        |     |
|------------------------------------------------------------------------|-----|
| 1. General Information.....                                            | S2  |
| 2. Optimization of the Reaction Conditions.....                        | S2  |
| 3. General Procedure.....                                              | S5  |
| 4. Characterization Data.....                                          | S5  |
| 5. References.....                                                     | S9  |
| 6. <sup>1</sup> H NMR and <sup>13</sup> C NMR Spectra of Products..... | S11 |

## 1. General Information

Unless otherwise indicated, all reagents were purchased from commercial distributors and used without further purification.  $^1\text{H}$  NMR and  $^{13}\text{C}$  NMR were recorded at 400 MHz and 100 MHz, respectively, using tetramethylsilane as an internal reference. High-resolution mass spectra (HRMS) were measured on a quadrupole time-of-flight (Q-TOF) mass spectrometer instrument with an electrospray ionization (ESI) source. Melting points were uncorrected. Flash column chromatography was performed over silica gel 200-300 mesh. Thin-layer chromatography (TLC) was carried out with silica gel GF254 plates. Glycine derivatives **1** were prepared according to the previous reported protocols.<sup>1</sup>

## 2. Optimization of the Reaction Conditions

**Table S1.** Screening of Catalysts<sup>a,b</sup>

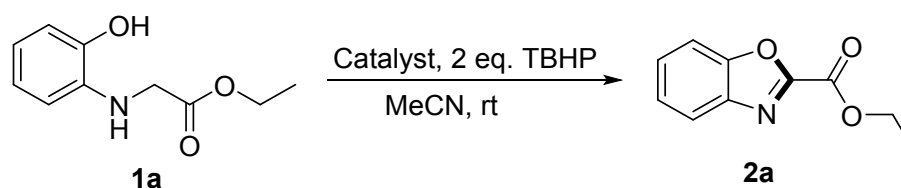

| Entry | Catalyst             | Oxidant     | Solvent     | Yield (%) <sup>b</sup> |
|-------|----------------------|-------------|-------------|------------------------|
| 1     | CuI                  | TBHP        | MeCN        | 27                     |
| 2     | CuBr                 | TBHP        | MeCN        | 20                     |
| 3     | <b>CuCl</b>          | <b>TBHP</b> | <b>MeCN</b> | <b>53</b>              |
| 4     | CuBr <sub>2</sub>    | TBHP        | MeCN        | 7                      |
| 5     | CuCl <sub>2</sub>    | TBHP        | MeCN        | 10                     |
| 6     | Cu(OAc) <sub>2</sub> | TBHP        | MeCN        | 26                     |
| 7     | Cu(OTf) <sub>2</sub> | TBHP        | MeCN        | 10                     |
| 8     | FeCl <sub>3</sub>    | TBHP        | MeCN        | 30                     |
| 9     | FeCl <sub>2</sub>    | TBHP        | MeCN        | trace                  |
| 10    | CoCl <sub>2</sub>    | TBHP        | MeCN        | trace                  |

(a) Reaction conditions: **1a** (0.2 mmol), catalyst (5 mol %), TBHP (70 % solution in water, 2 eq.), MeCN (2 mL) at room temperature for 2-4 hrs. (b) Isolated yield.

**Table S2.** Screening of Oxidants<sup>a,b</sup>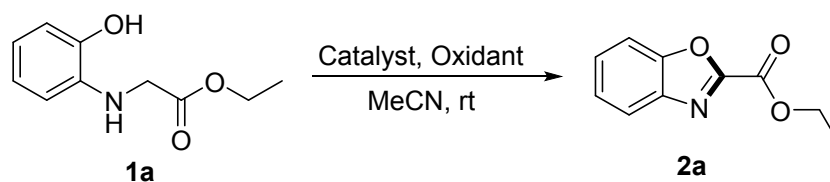

| Entry           | Catalyst    | Oxidant                                      | Solvent     | Yield (%) <sup>b</sup> |
|-----------------|-------------|----------------------------------------------|-------------|------------------------|
| 1               | CuCl        | TBHP                                         | MeCN        | 53                     |
| 2               | CuCl        | DTBP                                         | MeCN        | 15                     |
| 4               | CuCl        | TBPB                                         | MeCN        | 46                     |
| 5               | CuCl        | DCP                                          | MeCN        | trace                  |
| 6               | <b>CuCl</b> | <b>BPO</b>                                   | <b>MeCN</b> | <b>66</b>              |
| 7               | CuCl        | PhI(OAc) <sub>2</sub>                        | MeCN        | 31                     |
| 8               | CuCl        | K <sub>2</sub> S <sub>2</sub> O <sub>8</sub> | MeCN        | trace                  |
| 9               | CuCl        | O <sub>2</sub>                               | MeCN        | trace                  |
| 10              | CuCl        | --                                           | MeCN        | trace                  |
| 11              | CuCl        | N <sub>2</sub>                               | MeCN        | 0                      |
| 12 <sup>c</sup> | CuCl        | BPO                                          | MeCN        | 22                     |
| 13 <sup>d</sup> | CuCl        | BPO                                          | MeCN        | 27                     |

(a) Reaction conditions: **1a** (0.2 mmol), CuCl (5 mol %), oxidant (2 eq.), MeCN (2 mL) at room temperature for 2-4 hrs. BPO (75%(wetted with ca. 25% Water)). (b) Isolated yield. (c) BPO (1 eq.). (d) BPO (3.0 eq.).

**Table S3.** Screening of Solvents and Temperature<sup>a,b</sup>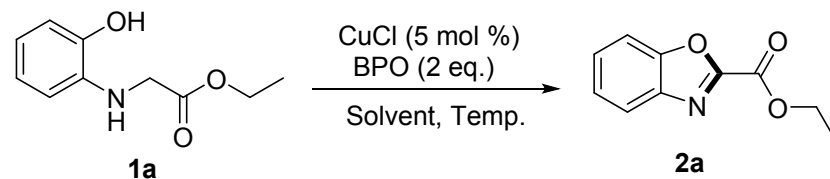

| Entry | Catalyst | Temperature (°C) | Solvent | Yield (%) <sup>b</sup> |
|-------|----------|------------------|---------|------------------------|
| 1     | CuCl     | rt               | MeCN    | 66                     |
| 2     | CuCl     | rt               | Tolnene | 35                     |
| 3     | CuCl     | rt               | EtOAc   | 51                     |
| 4     | CuCl     | rt               | DCE     | 40                     |

|          |             |           |            |           |
|----------|-------------|-----------|------------|-----------|
| <b>5</b> | <b>CuCl</b> | <b>rt</b> | <b>DCM</b> | <b>72</b> |
| 6        | CuCl        | rt        | DMF        | 23        |
| 7        | CuCl        | rt        | EtOH       | 14        |
| 8        | CuCl        | rt        | PhCl       | 25        |
| 9        | CuCl        | rt        | DMSO       | 33        |
| 10       | CuCl        | 40        | DCM        | 67        |
| 11       | CuCl        | 60        | DCM        | 60        |

(a) Reaction conditions: **1a** (0.2 mmol), CuCl (5 mol %), BPO (2 equiv), solvent (2 mL) at room temperature for 2-4 hrs. (b) Isolated yield.

**Table S4.** Screening of Additives.<sup>a</sup>

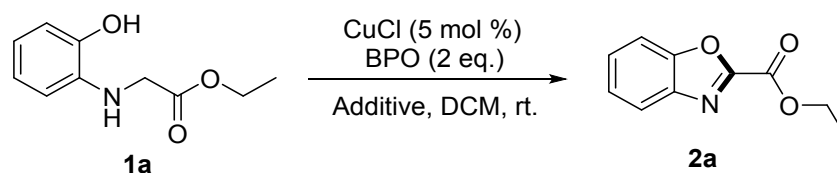

| Entry           | Catalyst    | Additive                           | Solvent    | Yield (%) <sup>b</sup> |
|-----------------|-------------|------------------------------------|------------|------------------------|
| 1               | CuCl        | CsCO <sub>3</sub>                  | DCM        | 64                     |
| 2               | CuCl        | <i>t</i> BuOK                      | DCM        | 49                     |
| 3               | CuCl        | <i>t</i> BuONa                     | DCM        | 65                     |
| 4               | CuCl        | LiCO <sub>3</sub>                  | DCM        | 70                     |
| 5               | CuCl        | DBU                                | DCM        | 61                     |
| 6               | CuCl        | DABCU                              | DCM        | 52                     |
| 7               | CuCl        | NaHCO <sub>3</sub>                 | DCM        | 69                     |
| 8               | CuCl        | Na <sub>2</sub> CO <sub>3</sub>    | DCM        | 73                     |
| <b>9</b>        | <b>CuCl</b> | <b>K<sub>2</sub>CO<sub>3</sub></b> | <b>DCM</b> | <b>84</b>              |
| 10              | CuCl        | NaOH                               | DCM        | 66                     |
| 11 <sup>c</sup> | CuCl        | K <sub>2</sub> CO <sub>3</sub>     | DCM        | 69                     |
| 12 <sup>d</sup> | CuCl        | K <sub>2</sub> CO <sub>3</sub>     | DCM        | 58                     |

(a) Reaction conditions: **1a** (0.2 mmol), CuCl (5 mol %), BPO (2 equiv), Base (1 equiv), Solvent (2 mL) at room temperature for 2-4 hours. (b) Isolated yield based on **2a**. (c) K<sub>2</sub>CO<sub>3</sub> (0.5 eq.). (d) K<sub>2</sub>CO<sub>3</sub> (2.0 eq.).

### 3. General Procedure

**General procedure for the synthesis of 2-substituted benzoxazoles.** To a mixture of glycine derivatives **1** (0.2 mmol) in MeCN (2 mL) was added CuCl (0.01 mmol, 1.0 mg) and BPO (0.4 mmol, 96.9 mg). Then, the reaction mixture was stirred at room temperature for 2-4 hours. After the reaction was completed, the resulting mixture was concentrated under vacuum and the residue was subjected to column chromatography (silica gel, petroleum ether/ethyl acetate as an eluent) to afford the desired cyclization products **2**.

### 4. Characterization Data

#### Ethyl benzo[d]oxazole-2-carboxylate (**2a**)<sup>2</sup>

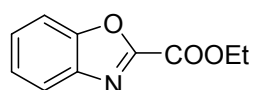

Yellowish-brown solid; mp 88-92.4 °C; <sup>1</sup>H NMR (400 MHz, CDCl<sub>3</sub>) δ 7.91 (d, *J* = 8.0 Hz, 1H), 7.68 (d, *J* = 8.8 Hz, 1H), 7.54 (t, *J* = 8.0 Hz, 1H), 7.47 (t, *J* = 8.4 Hz, 1H), 4.57 (q, *J* = 7.2 Hz, 2H), 1.51 (t, *J* = 6.8 Hz, 3H); <sup>13</sup>C NMR (100 MHz, CDCl<sub>3</sub>) δ 156.5, 152.8, 150.9, 140.6, 128.1, 125.7, 122.1, 111.7, 63.2, 14.2; HRMS (ESI) calcd for C<sub>10</sub>H<sub>10</sub>NO<sub>3</sub> (M+H)<sup>+</sup> 192.0655, found 192.0653.

#### Methyl benzo[d]oxazole-2-carboxylate (**2b**)<sup>3</sup>

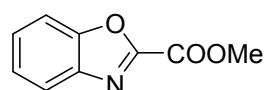

Yellowish-brown solid; mp 95.2-97.2 °C; <sup>1</sup>H NMR (400 MHz, CDCl<sub>3</sub>) δ 7.90 (d, *J* = 8.0 Hz, 1H), 7.67 (d, *J* = 8.4 Hz, 1H), 7.54 (t, *J* = 7.6 Hz, 1H), 7.47 (t, *J* = 7.6 Hz, 1H), 4.10 (s, 3H); <sup>13</sup>C NMR (100 MHz, CDCl<sub>3</sub>) δ 156.9, 152.5, 150.9, 140.5, 128.2, 125.8, 122.2, 111.8, 53.7; HRMS (ESI) calcd for C<sub>9</sub>H<sub>8</sub>NO<sub>3</sub> (M+H)<sup>+</sup> 178.0499, found 178.0498.

#### Propyl benzo[d]oxazole-2-carboxylate (**2c**)

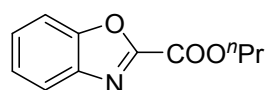

Yellowish-brown solid; mp 60.1-63.7 °C; <sup>1</sup>H NMR (400 MHz, CDCl<sub>3</sub>) δ 7.90 (d, *J* = 8.0 Hz, 1H), 7.66 (d, *J* = 8.4 Hz, 1H), 7.52 (t, *J* = 8.4 Hz, 1H), 7.45 (t, *J* = 8.4 Hz, 1H), 4.46 (t, *J* = 6.8 Hz, 2H), 1.97-1.81 (m, 2H), 1.07 (t, *J* = 7.2 Hz, 3H); <sup>13</sup>C NMR (100 MHz, CDCl<sub>3</sub>) δ 156.6, 152.8, 150.9, 140.6, 128.0, 125.7, 122.1, 111.7, 68.6, 21.9, 10.2; HRMS (ESI) calcd for C<sub>11</sub>H<sub>12</sub>NO<sub>3</sub>

(M+H)<sup>+</sup> 206.0812, found 206.0813.

**Isopropyl benzo[d]oxazole-2-carboxylate (2d)**

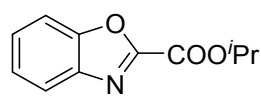

Yellow solid; mp 54.6-58.1 °C; <sup>1</sup>H NMR (400 MHz, CDCl<sub>3</sub>) δ 7.90 (d, *J* = 8.0 Hz, 1H), 7.66 (d, *J* = 8.4 Hz, 1H), 7.52 (t, *J* = 8.8 Hz, 1H), 7.45 (t, *J* = 7.2 Hz, 1H), 5.42 (dt, *J* = 6.4, 6.0 Hz, 1H), 1.48 (d, *J* = 6.0 Hz, 6H); <sup>13</sup>C NMR (100 MHz, CDCl<sub>3</sub>) δ 156.1, 153.1, 150.9, 140.6, 128.0, 125.6, 122.1, 111.7, 71.5, 21.7. HRMS (ESI) calcd for C<sub>11</sub>H<sub>12</sub>NO<sub>3</sub> (M+H)<sup>+</sup> 206.0812, found 206.0812.

**Isobutyl benzo[d]oxazole-2-carboxylate (2e)**

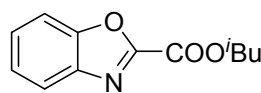

Yellow solid; mp 97.4-97.7 °C; <sup>1</sup>H NMR (400 MHz, CDCl<sub>3</sub>) δ 7.91 (d, *J* = 8.0 Hz, 1H), 7.67 (d, *J* = 8.0 Hz, 1H), 7.53 (t, *J* = 7.6 Hz, 1H), 7.46 (t, *J* = 7.6 Hz, 1H), 4.28 (d, *J* = 6.8 Hz, 2H), 2.20 (dt, *J* = 13.2, 6.8 Hz, 1H), 1.06 (d, *J* = 6.8 Hz, 6H); <sup>13</sup>C NMR (100 MHz, CDCl<sub>3</sub>) δ 156.6, 152.8, 150.9, 140.6, 128.1, 125.7, 122.2, 111.7, 73.0, 27.8, 19.0. HRMS (ESI) calcd for C<sub>12</sub>H<sub>14</sub>NO<sub>3</sub> (M+H)<sup>+</sup> 220.0968, found 220.0970.

***tert*-Butyl benzo[d]oxazole-2-carboxylate (2f)<sup>4</sup>**

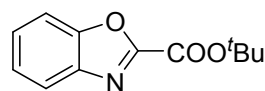

Yellow oil liquid; <sup>1</sup>H NMR (500 MHz, CDCl<sub>3</sub>) δ 7.89 (d, *J* = 8.0 Hz, 1H), 7.65 (d, *J* = 8.0 Hz, 1H), 7.51 (t, *J* = 8.5 Hz, 1H), 7.44 (t, *J* = 7.5 Hz, 1H), 1.69 (s, 9H); <sup>13</sup>C NMR (125 MHz, CDCl<sub>3</sub>) δ 155.6, 153.7, 150.8, 140.6, 127.9, 125.6, 122.1, 111.7, 85.2, 28.1; HRMS (ESI) calcd for C<sub>12</sub>H<sub>14</sub>NO<sub>3</sub> (M+H)<sup>+</sup> 220.0968, found 220.0967.

**Benzyl benzo[d]oxazole-2-carboxylate (2g)<sup>5</sup>**

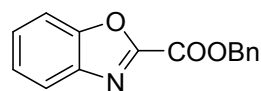

Yellowish solid; mp 91.1 -93.7 °C; <sup>1</sup>H NMR (400 MHz, CDCl<sub>3</sub>) δ 7.89 (d, *J* = 8.0 Hz, 1H), 7.65 (d, *J* = 8.4 Hz, 1H), 7.61-7.28 (m, 7H), 5.51 (s, 2H); <sup>13</sup>C NMR (100 MHz, CDCl<sub>3</sub>) δ 156.4, 152.6, 150.9, 140.6, 134.5, 128.9, 128.9, 128.8, 128.2, 125.8, 122.2, 111.7, 68.6; HRMS (ESI) calcd for C<sub>11</sub>H<sub>12</sub>NO<sub>3</sub> (M+H)<sup>+</sup> 206.0812, found 206.0813.

**Phenyl benzo[d]oxazole-2-carboxylate (2h)**

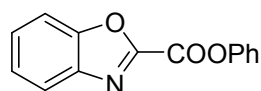

Orange solid; m.p. 152.1-155.8°C; <sup>1</sup>H NMR (400 MHz, CDCl<sub>3</sub>) δ 8.11 (s, 2H), 7.81 (d, *J* = 7.8 Hz, 2H), 7.56 (t, *J* = 7.6 Hz, 2H),

7.44-7.30 (m, 3H);  $^{13}\text{C}$  NMR (100 MHz,  $\text{CDCl}_3$ )  $\delta$  152.3, 146.4, 146.3, 132.1, 131.2, 129.6, 125.7, 116.8. HRMS (ESI) calcd for  $\text{C}_{14}\text{H}_{10}\text{NO}_3$  ( $\text{M}+\text{H}$ ) $^+$  240.0655, found 240.0645.

#### Ethyl 6-methylbenzo[d]oxazole-2-carboxylate (2i)

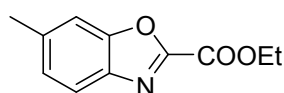

Yellowish solid; m.p. 85.3-86.7 °C;  $^1\text{H}$  NMR (400 MHz,  $\text{CDCl}_3$ )  $\delta$  7.75 (d,  $J$  = 8.4 Hz, 1H), 7.44 (s, 1H), 7.26 (d,  $J$  = 8.0 Hz, 1H), 4.55 (q,  $J$  = 7.2 Hz, 2H), 2.53 (s, 3H), 1.49 (t,  $J$  = 7.2 Hz, 3H);  $^{13}\text{C}$  NMR (100 MHz,  $\text{CDCl}_3$ )  $\delta$  156.6, 152.4, 151.2, 139.1, 138.4, 127.3, 121.4, 111.5, 63.0, 22.0, 14.1; HRMS (ESI) calcd for  $\text{C}_{11}\text{H}_{12}\text{NO}_3$  ( $\text{M}+\text{H}$ ) $^+$  206.0811, found 206.0812.

#### Ethyl 6-chlorobenzo[d]oxazole-2-carboxylate (2j)<sup>6</sup>

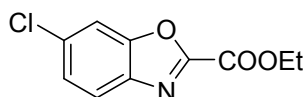

Yellow solid; mp 98.2-103.2 °C;  $^1\text{H}$  NMR (400 MHz,  $\text{CDCl}_3$ )  $\delta$  7.88 (d,  $J$  = 2.0 Hz, 1H), 7.68-7.40 (m, 2H), 4.57 (q,  $J$  = 7.2 Hz, 2H), 1.50 (t,  $J$  = 7.2 Hz, 3H);  $^{13}\text{C}$  NMR (100 MHz,  $\text{CDCl}_3$ )  $\delta$  156.1, 153.9, 149.4, 141.5, 131.5, 128.7, 121.9, 112.6, 63.5, 14.1; HRMS (ESI) calcd for  $\text{C}_{10}\text{H}_9\text{ClNO}_3$  ( $\text{M}+\text{H}$ ) $^+$  226.0262, found 226.0266.

#### Ethyl 5-methylbenzo[d]oxazole-2-carboxylate (2k)

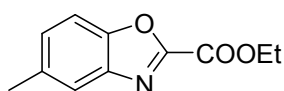

Yellow solid; mp 97.4-98.6 °C,  $^1\text{H}$  NMR (400 MHz,  $\text{CDCl}_3$ )  $\delta$  7.66 (s, 1H), 7.53 (d,  $J$  = 8.5 Hz, 1H), 7.33 (d,  $J$  = 8.4 Hz, 1H), 4.56 (q,  $J$  = 7.1 Hz, 2H), 2.50 (s, 3H), 1.50 (t,  $J$  = 7.1 Hz, 3H);  $^{13}\text{C}$  NMR (100 MHz,  $\text{CDCl}_3$ )  $\delta$  156.56, 152.83, 149.18, 140.74, 135.83, 129.54, 121.66, 111.06, 63.15, 21.49, 14.18. HRMS (ESI) calcd for  $\text{C}_{11}\text{H}_{12}\text{NO}_3$  ( $\text{M}+\text{H}$ ) $^+$  206.0811, found 206.0812. Ethyl 5-(trifluoromethyl)benzo[d]oxazole-2-carboxylate (2l)

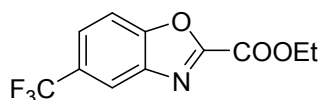

Yellow oil liquid;  $^1\text{H}$  NMR (500 MHz,  $\text{CDCl}_3$ )  $\delta$  8.19 (s, 1H), 7.92 – 7.67 (m, 2H), 4.60 (q,  $J$  = 7.2 Hz, 2H), 1.52 (t,  $J$  = 7.2 Hz, 3H).  $^{13}\text{C}$  NMR (125 MHz,  $\text{CDCl}_3$ )  $\delta$  156.0, 154.3, 152.4, 140.5, 128.7 (q,  $J$  = 32.5 Hz), 125.3 (q,  $J$  = 3.75 Hz), 123.7 (q,  $J$  = 271.3 Hz), 120.0 (q,  $J$  = 3.75 Hz), 112.6, 63.7, 14.2. HRMS (ESI) calcd for  $\text{C}_{11}\text{H}_8\text{F}_3\text{NO}_3$  ( $\text{M}+\text{H}$ ) $^+$  260.0529, found 260.0526.

#### Benzo[d]oxazol-2-yl(phenyl)methanone (2m)

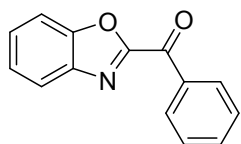

Yellow solid; mp 66.3-68.7 °C; <sup>1</sup>H NMR (400 MHz, CDCl<sub>3</sub>) δ 8.55 (d, *J* = 8.5 Hz, 2H), 7.95 (d, *J* = 8.0 Hz, 1H), 7.69 (dd, *J* = 14.5, 7.7 Hz, 2H), 7.56 (dd, *J* = 15.1, 7.7 Hz, 3H), 7.47 (t, *J* = 8.2 Hz, 1H). <sup>13</sup>C NMR (100 MHz, CDCl<sub>3</sub>) δ 180.5, 157.2, 150.5, 140.8, 135.1, 134.3, 131.0, 128.6, 128.4, 125.7, 122.4, 111.8. HRMS (ESI) calcd for C<sub>14</sub>H<sub>9</sub>NO<sub>2</sub> (M+H)<sup>+</sup> 224.0706, found 224.0700.

***N*-Methylbenzo[d]oxazole-2-carboxamide (2n)<sup>6</sup>**

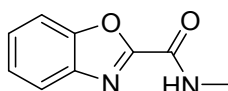

Yellow solid; mp 97.4-98.6 °C; <sup>1</sup>H NMR (400 MHz, CDCl<sub>3</sub>) δ 7.79 (d, *J* = 8.4 Hz, 1H), 7.66 (d, *J* = 8.4 Hz, 1H), 7.46 (dt, *J* = 11.6, 7.6 Hz, 2H), 7.34 (s, 1H), 3.09 (d, *J* = 5.2 Hz, 3H); <sup>13</sup>C NMR (100 MHz, CDCl<sub>3</sub>) δ 156.3, 155.5, 151.1, 140.3, 127.3, 125.5, 121.2, 111.9, 26.5; HRMS (ESI) calcd for C<sub>9</sub>H<sub>9</sub>N<sub>2</sub>O<sub>3</sub> (M+H)<sup>+</sup> 177.0659, found 177.0657.

***N*-ethylbenzo[d]oxazole-2-carboxamide (2o)<sup>6</sup>**

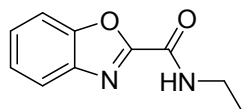

Yellow solid; mp 94.2-95.6 °C; <sup>1</sup>H NMR (400 MHz, CDCl<sub>3</sub>) δ 7.78 (d, *J* = 7.6 Hz, 1H), 7.66 (d, *J* = 8.0 Hz, 1H), 7.55-7.38 (m, 2H), 7.32 (s, 1H), 3.67-3.47 (m, 2H), 1.31 (t, *J* = 7.2 Hz, 3H); <sup>13</sup>C NMR (100 MHz, CDCl<sub>3</sub>) δ 155.6, 155.6, 151.1, 140.3, 127.3, 125.5, 121.3, 111.9, 34.8, 14.6; HRMS (ESI) calcd for C<sub>10</sub>H<sub>11</sub>N<sub>2</sub>O<sub>2</sub> (M+H)<sup>+</sup> 191.0815, found 191.0814.

***N,N*-dimethylbenzo[d]oxazole-2-carboxamide (2p)<sup>6</sup>**

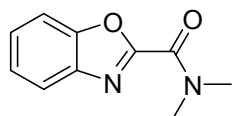

Yellow solid; mp 79.2-81.8 °C; <sup>1</sup>H NMR (400 MHz, CDCl<sub>3</sub>) δ 7.82 (d, *J* = 7.6 Hz, 1H), 7.65 (d, *J* = 8.1 Hz, 1H), 7.44 (dt, *J* = 15.2, 7.2 Hz, 2H), 3.52 (s, 3H), 3.21 (s, 3H). <sup>13</sup>C NMR (101 MHz, CDCl<sub>3</sub>) δ 157.6, 155.2, 159.0, 140.3, 127.1, 125.2, 121.3, 111.6, 38.9, 36.5. HRMS (ESI) calcd for C<sub>10</sub>H<sub>10</sub>N<sub>2</sub>O<sub>2</sub> (M+H)<sup>+</sup> 191.0815, found 191.0813.

***N*-Benzylbenzo[d]oxazole-2-carboxamide (2q)<sup>6</sup>**

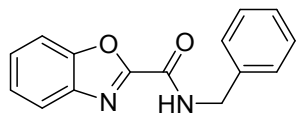

Yellow solid; mp 93.4-95.9 °C; <sup>1</sup>H NMR (400 MHz, CDCl<sub>3</sub>) δ 7.76 (d, *J* = 7.6 Hz, 1H), 7.66 (d, *J* = 8.4 Hz, 2H), 7.50-7.33 (m, 6H), 4.70 (d, *J* = 6.0 Hz, 2H); <sup>13</sup>C NMR (100 MHz, CDCl<sub>3</sub>) δ 155.6, 155.5, 151.3, 140.3, 137.0, 128.9, 128.0, 127.9, 127.4, 125.6, 121.2, 111.9, 43.9; HRMS (ESI) calcd for C<sub>15</sub>H<sub>13</sub>N<sub>2</sub>O<sub>2</sub> (M+H)<sup>+</sup> 253.0972, found 253.0971.



### Ethyl (benzo[d]oxazole-2-carbonyl)glycinate (2r)

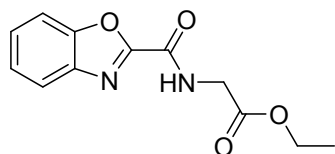

Yellow solid; mp 109.9-110.4 °C ; <sup>1</sup>H NMR (400 MHz, CDCl<sub>3</sub>) δ 7.82 (d, *J* = 8.0 Hz, 1H), δ 7.81 (s, 1H), 7.66 (d, *J* = 8.0 Hz, 1H), 7.5-7.36 (m, 2H), 4.58-3.95 (m, 4H), 1.32 (t, *J* = 7.2 Hz, 3H); <sup>13</sup>C NMR (100 MHz, CDCl<sub>3</sub>) δ 169.0, 155.8, 154.9, 151.2, 140.2, 127.6, 125.6, 121.5, 111.9, 61.9, 41.6, 14.2. HRMS (ESI) calcd for C<sub>12</sub>H<sub>13</sub>N<sub>2</sub>O<sub>3</sub> (M+H)<sup>+</sup> 249.0870, found 249.0868.

### Ethyl (benzo[d]oxazole-2-carbonyl)valinate (2s)

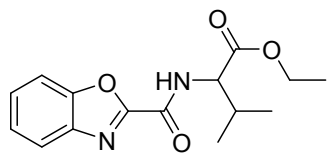

Yellow oil liquid; <sup>1</sup>H NMR (400 MHz, CDCl<sub>3</sub>) δ 7.83 (d, *J* = 8.0 Hz, 1H), 7.75 (d, *J* = 8.8 Hz, 1H), 7.66 (d, *J* = 7.6 Hz, 1H), 7.54-7.38 (m, 2H), 4.77 (dd, *J* = 9.2, 4.8 Hz, 1H), 4.27 (q, *J* = 6.8 Hz, 2H), 2.67-2.14 (m, 1H), 1.32 (t, *J* = 7.2 Hz, 3H), 1.11-0.96 (m, 6H); <sup>13</sup>C NMR (100 MHz, CDCl<sub>3</sub>) δ 172.0, 155.5, 155.1, 151.2, 140.3, 127.5, 125.6, 121.4, 111.8, 61.6, 57.6, 31.6, 19.0, 17.8, 14.2; HRMS (ESI) calcd for C<sub>18</sub>H<sub>17</sub>N<sub>2</sub>O<sub>4</sub> (M+H)<sup>+</sup> 325.1183, found 325.1184.

### Methyl (benzo[d]oxazole-2-carbonyl)phenylalaninate (2t)

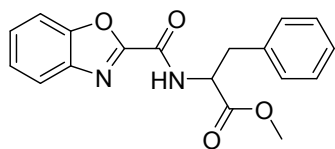

Yellow oil liquid; <sup>1</sup>H NMR (400 MHz, CDCl<sub>3</sub>) δ 7.80 (d, *J* = 7.6 Hz, 1H), 7.71 (d, *J* = 8.0 Hz, 1H), 7.64 (d, *J* = 8.0 Hz, 1H), 7.53-7.39 (m, 2H), 7.33-7.16 (m, 5H), 5.11 (dt, *J* = 8.0, 6.0 Hz, 1H), 3.77 (s, 3H), 3.28 (qd, *J* = 12.8, 6.0 Hz, 2H); <sup>13</sup>C NMR (100 MHz, CDCl<sub>3</sub>) δ 171.0, 155.2, 154.8, 151.2, 140.2, 135.4, 129.3, 128.8, 127.5, 127.4, 125.6, 121.5, 111.8, 53.6, 52.6, 38.0; HRMS (ESI) calcd for C<sub>15</sub>H<sub>19</sub>N<sub>2</sub>O<sub>4</sub> (M+H)<sup>+</sup> 291.1339, found 291.1338.

## 5. References

- (1) Z. Nace and K. Danijel, *Tetrahedron* 2008, **24**, 5756-5761.
- (2) W.-M. Shi, X. H. Li, C. Liang and D.-L. Mo, *Adv. Synth. Catal.* 2017, **359**, 4129-4135.
- (3) J.-H. Chen, C.-H. Deng, S. Fang, J.-G. Ma and P. Cheng, *Green Chem.* 2018, **20**, 989-996.
- (4) M. Baltas, K. Raouf-Benchekroun, A.-D. L. Blica, Cazaux, P. Tisnes, L. Gorrichon, K. Hussein and J.-C Barthelet, *Tetrahedron* 1996, **52**, 14865-14876.
- (5) A. Thorarensen, C.-J Ruble and D.-L. Romero, *Antibacterial benzoic acid derivatives*: US 2004.
- (6) K. DickoreK.; K. Sasse and K.-D. Bode, *Liebigs Ann. Chem.* 1970, **733**, 70-87.

## 6. <sup>1</sup>H NMR and <sup>13</sup>C NMR Spectra of Products

### $^1\text{H}$ NMR Spectra of ethyl benzo[*d*]oxazole-2-carboxylate (**2a**)

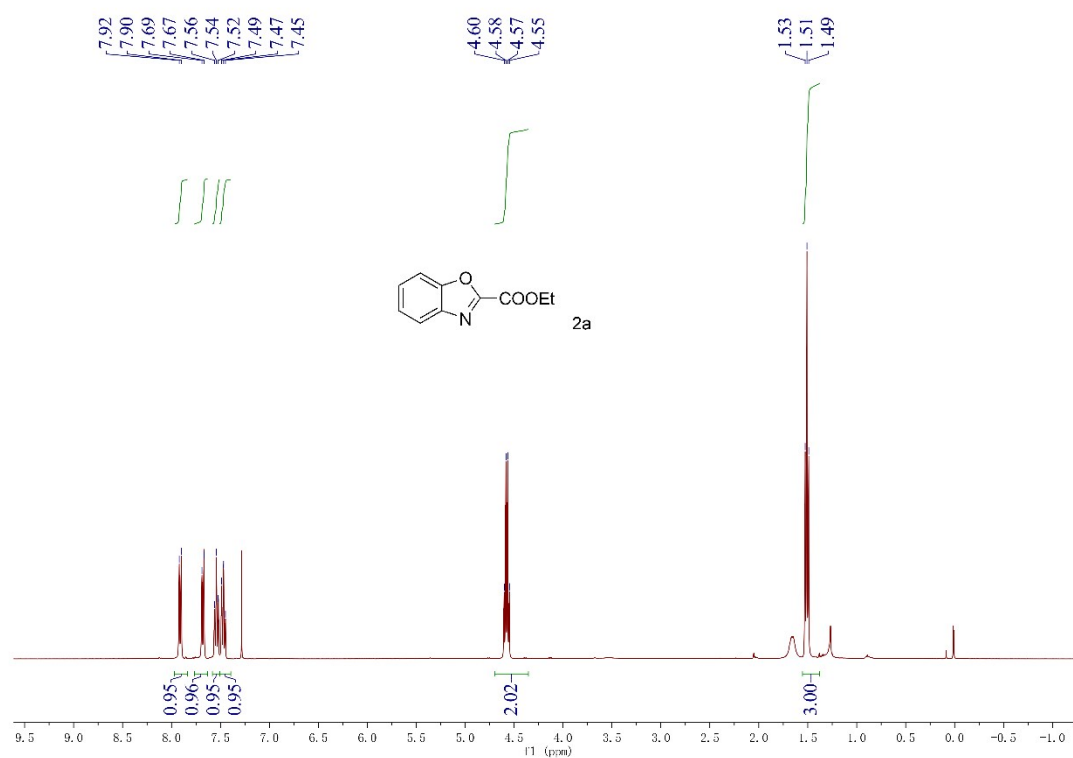

### $^{13}\text{C}$ NMR Spectra of ethyl benzo[*d*]oxazole-2-carboxylate (**2a**)

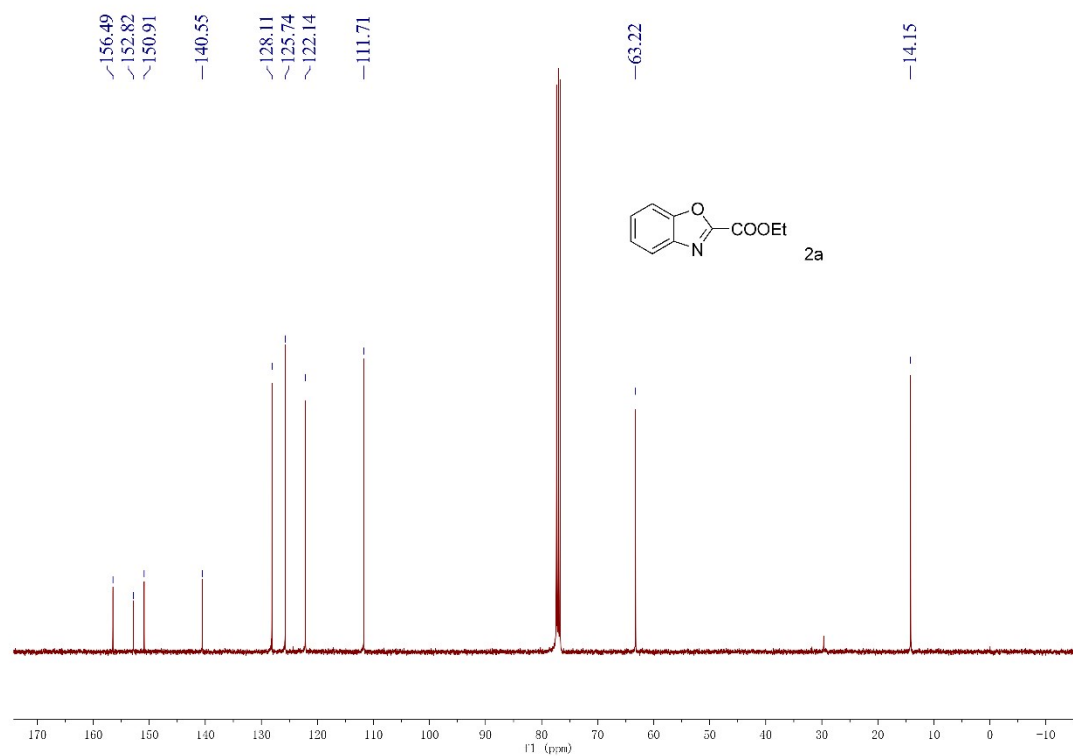

### $^1\text{H}$ NMR Spectra of methyl benzo[*d*]oxazole-2-carboxylate (**2b**)

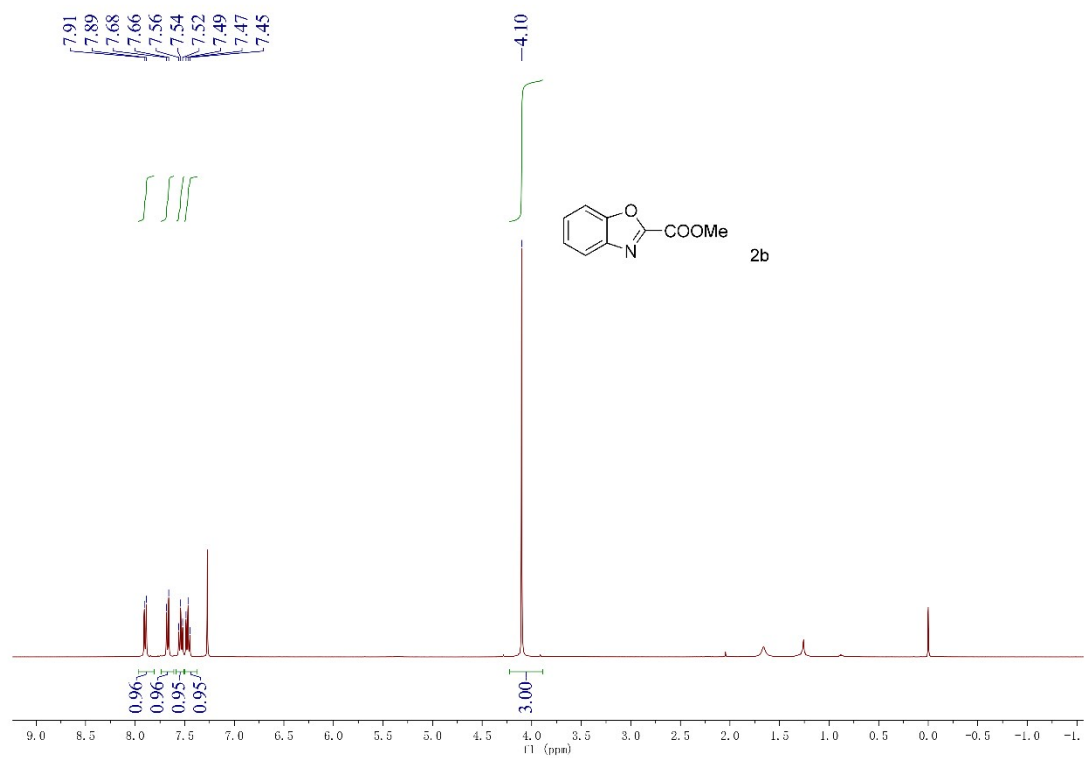

### $^{13}\text{C}$ NMR Spectra of methyl benzo[*d*]oxazole-2-carboxylate (**2b**)

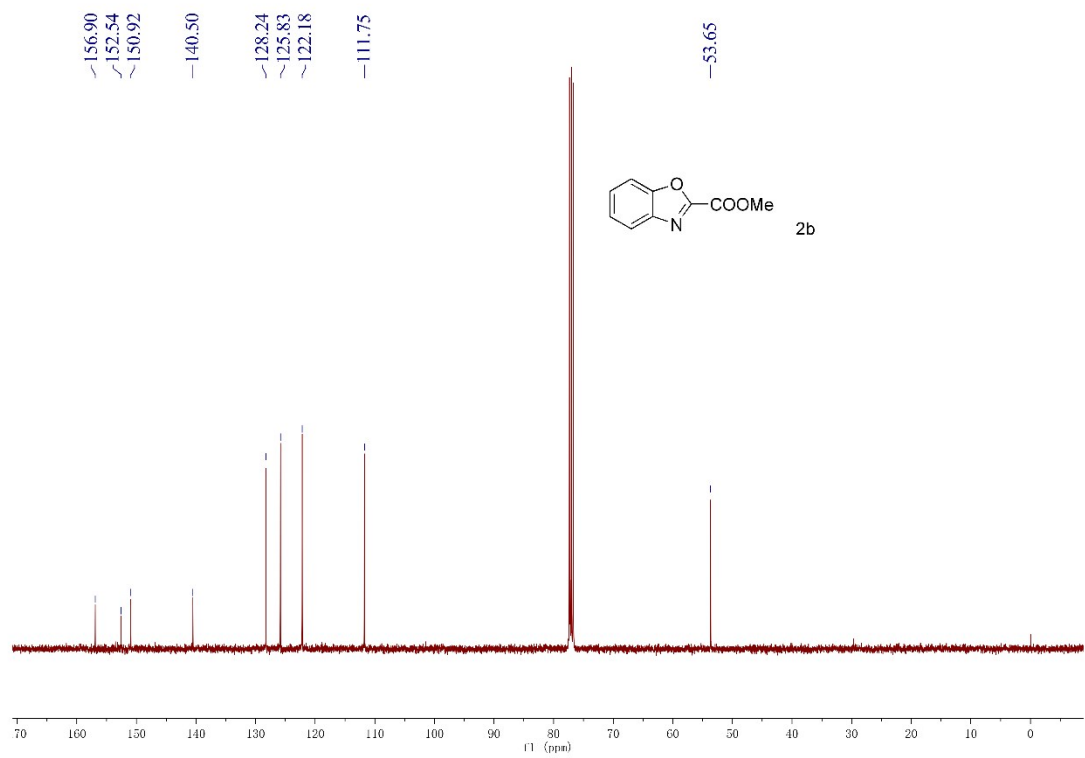

### <sup>1</sup>H NMR Spectra of propyl benzo[*d*]oxazole-2-carboxylate (**2c**)

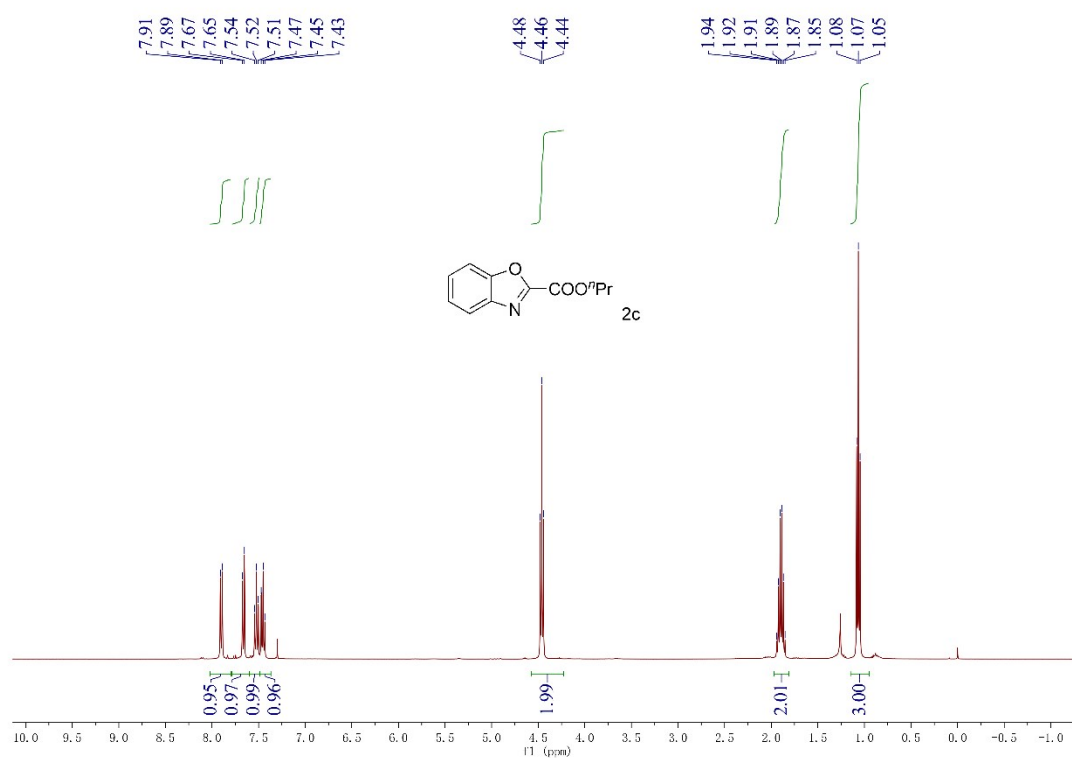

### <sup>13</sup>C NMR Spectra of propyl benzo[*d*]oxazole-2-carboxylate (**2c**)

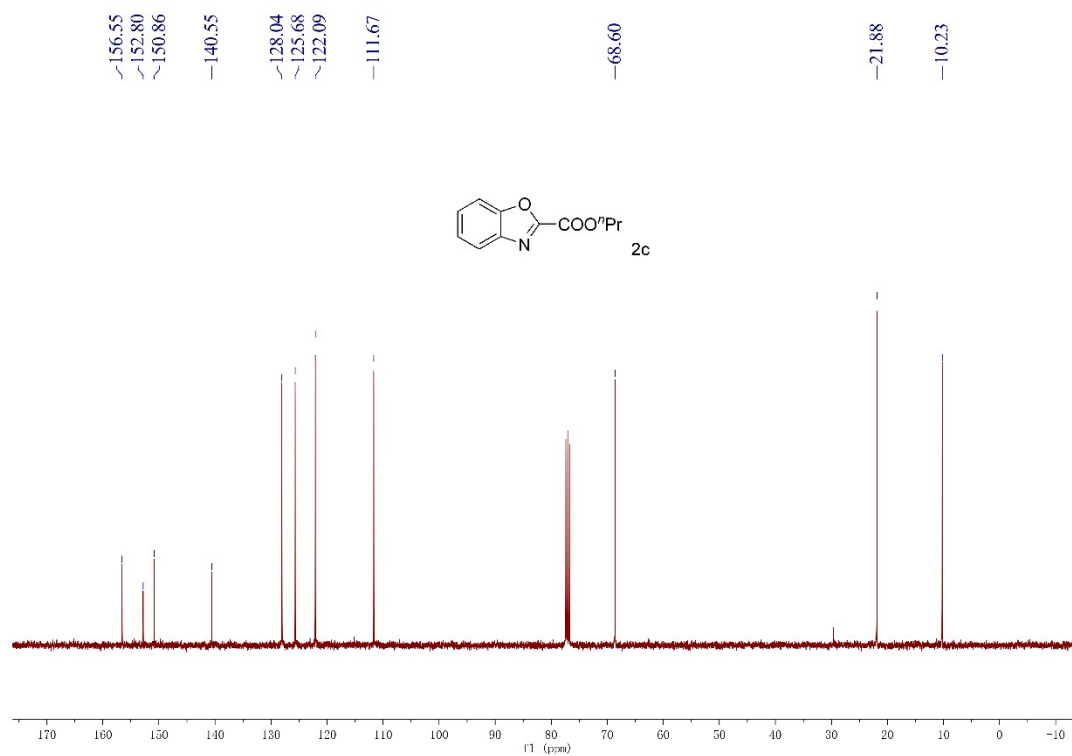

### $^1\text{H}$ NMR Spectra of isopropyl benzo[*d*]oxazole-2-carboxylate (**2d**)

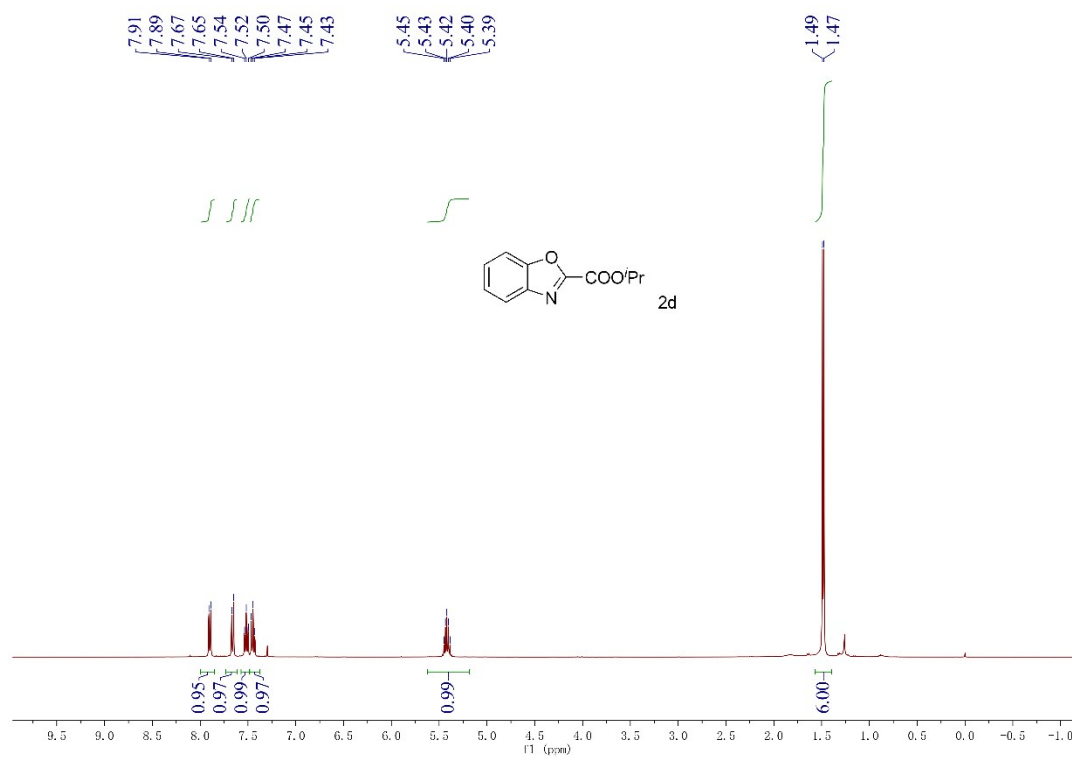

### $^{13}\text{C}$ NMR Spectra of isopropyl benzo[*d*]oxazole-2-carboxylate (**2d**)

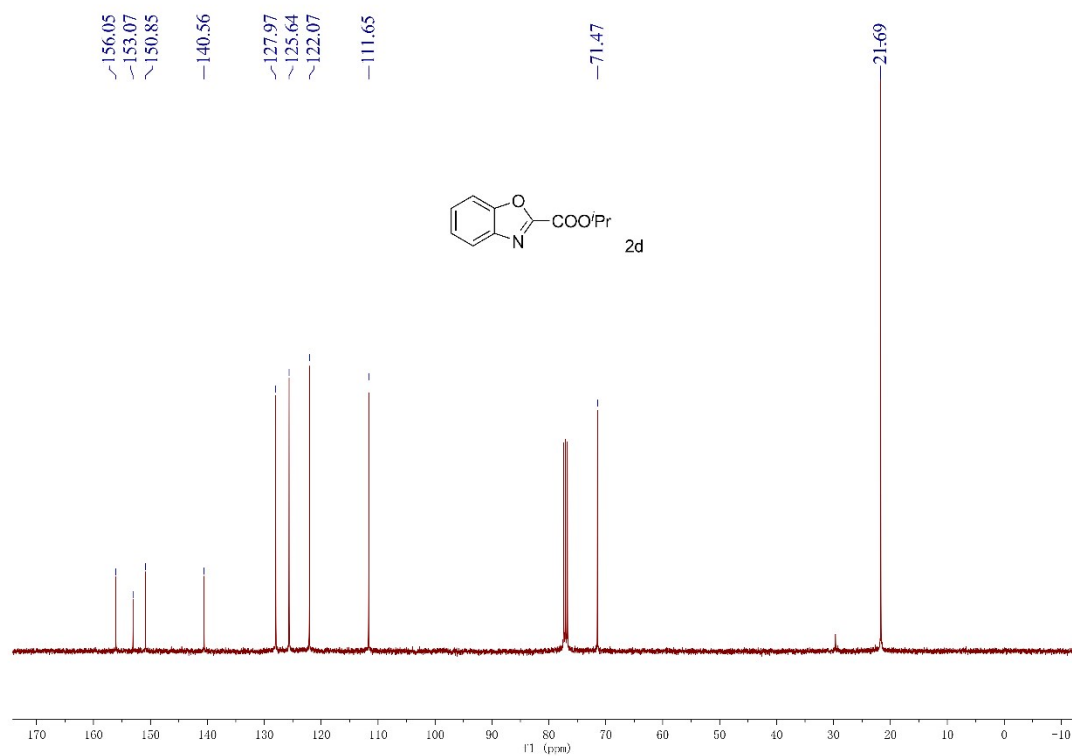

<sup>1</sup>H NMR Spectra of isobutyl benzo[d]oxazole-2-carboxylate (**2e**)

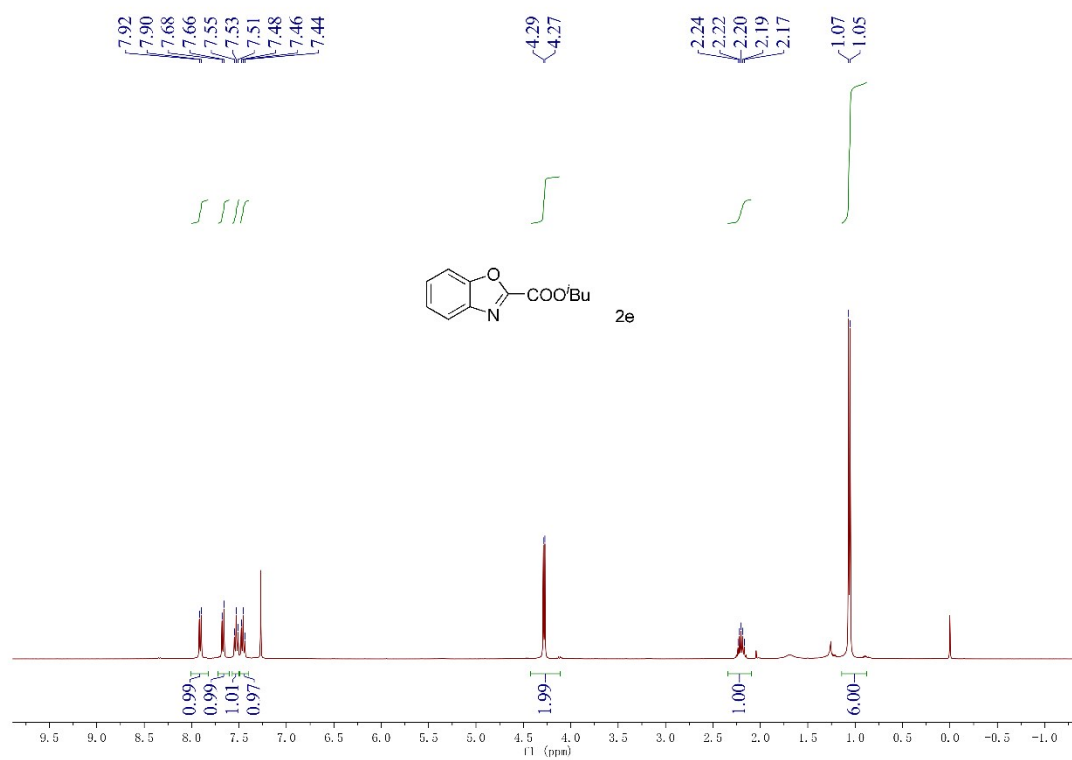

<sup>13</sup>C NMR Spectra of isobutyl benzo[d]oxazole-2-carboxylate (**2e**)

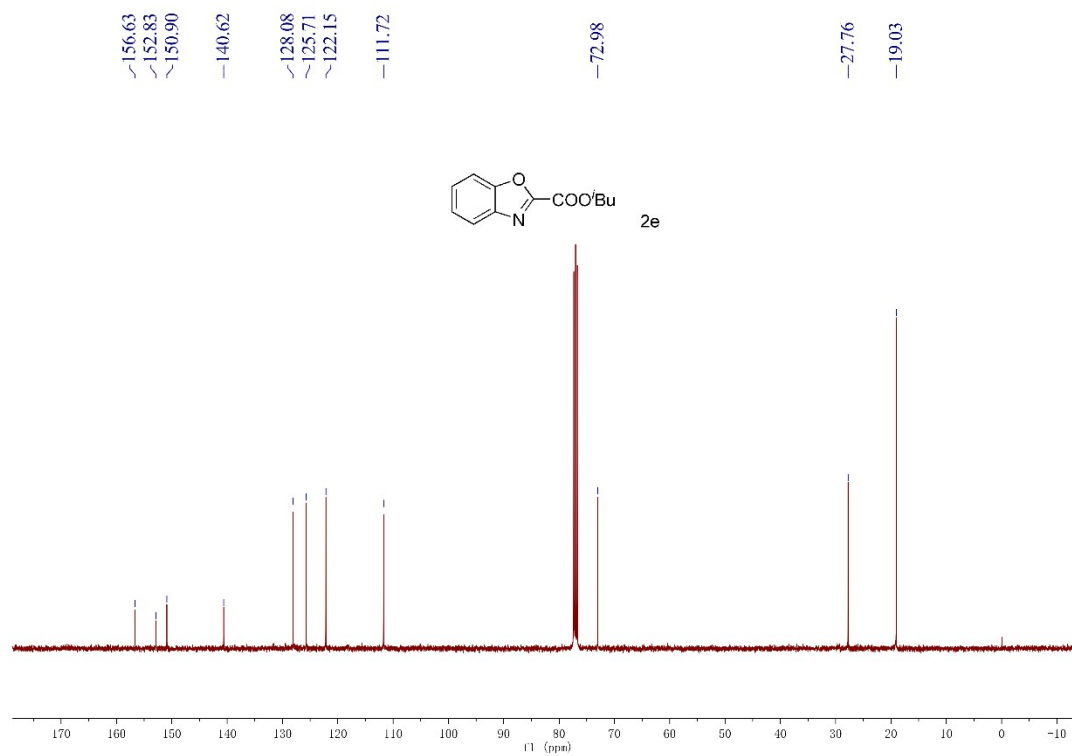

<sup>1</sup>H NMR Spectra of *tert*-butyl benzo[*d*]oxazole-2-carboxylate (**2f**)

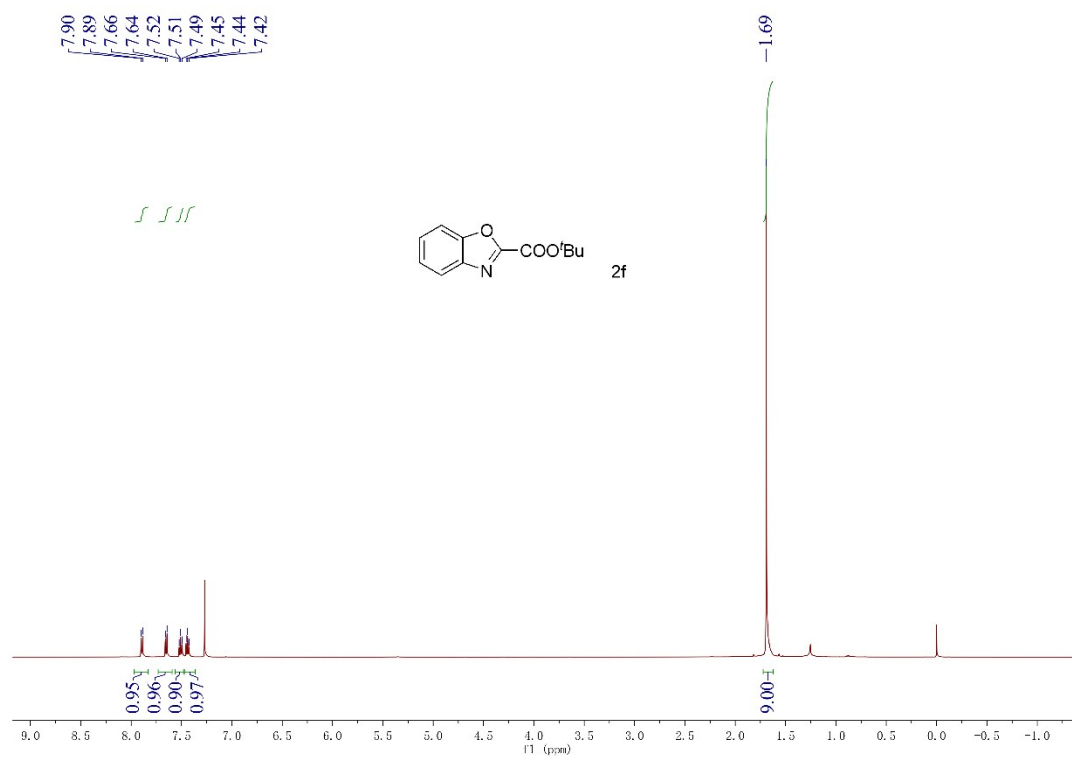

<sup>13</sup>C NMR Spectra of *tert*-butyl benzo[*d*]oxazole-2-carboxylate (**2f**)

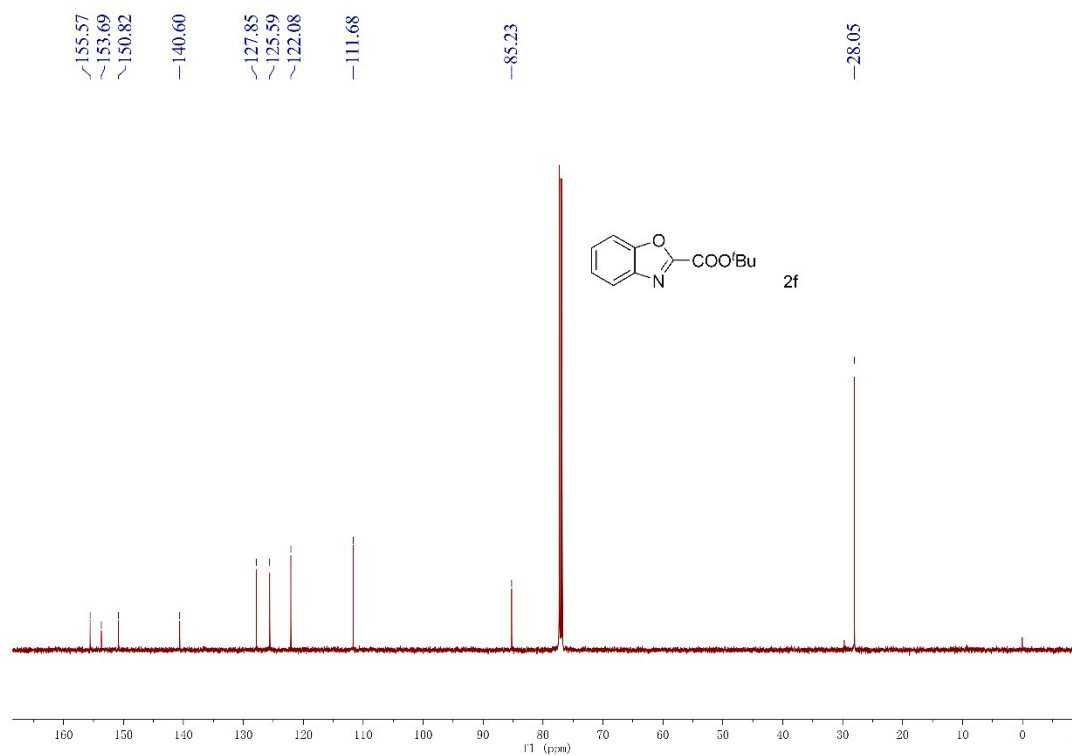



### $^1\text{H}$ NMR Spectra of benzyl benzo[*d*]oxazole-2-carboxylate (**2g**)

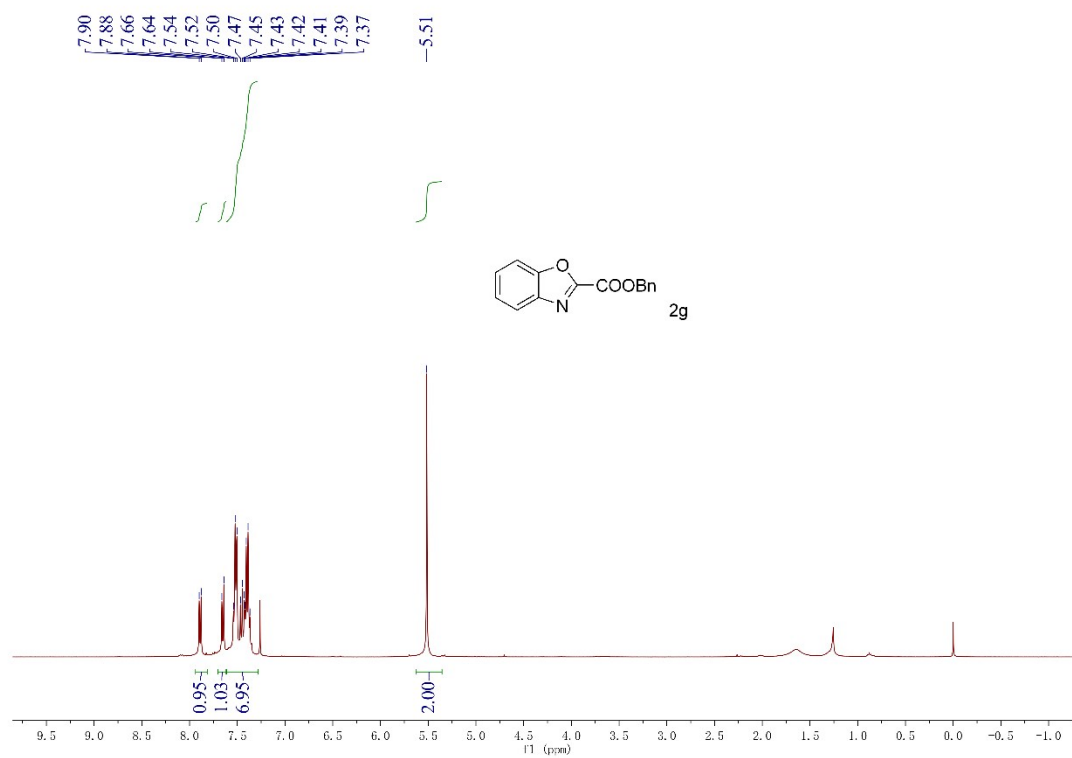

### $^{13}\text{C}$ NMR Spectra of benzyl benzo[*d*]oxazole-2-carboxylate (**2g**)

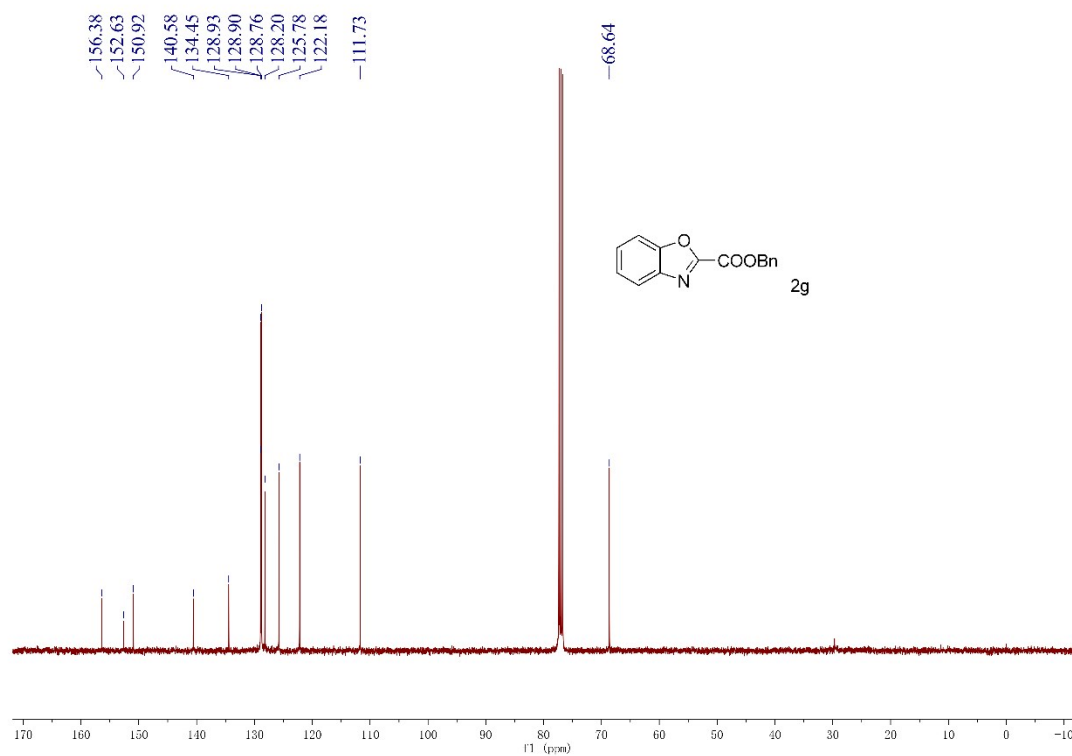

### $^1\text{H}$ NMR Spectra of phenyl benzo[*d*]oxazole-2-carboxylate (**2h**)

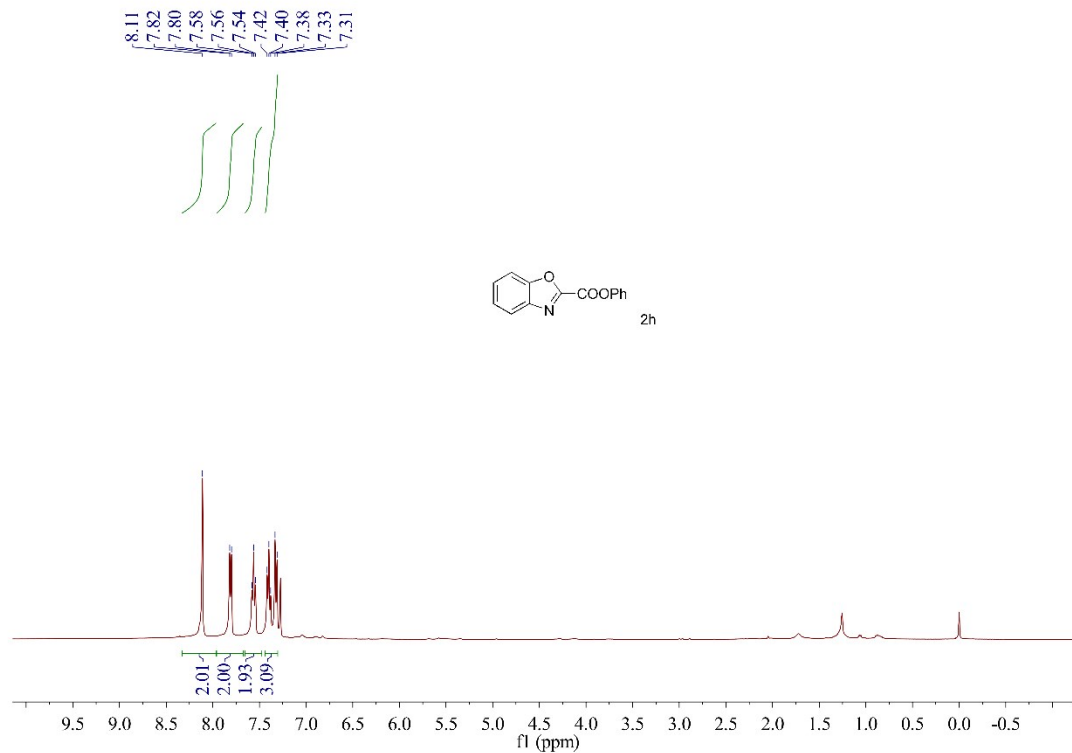

<sup>13</sup>C NMR Spectra of phenyl benzo[*d*]oxazole-2-carboxylate (**2h**)

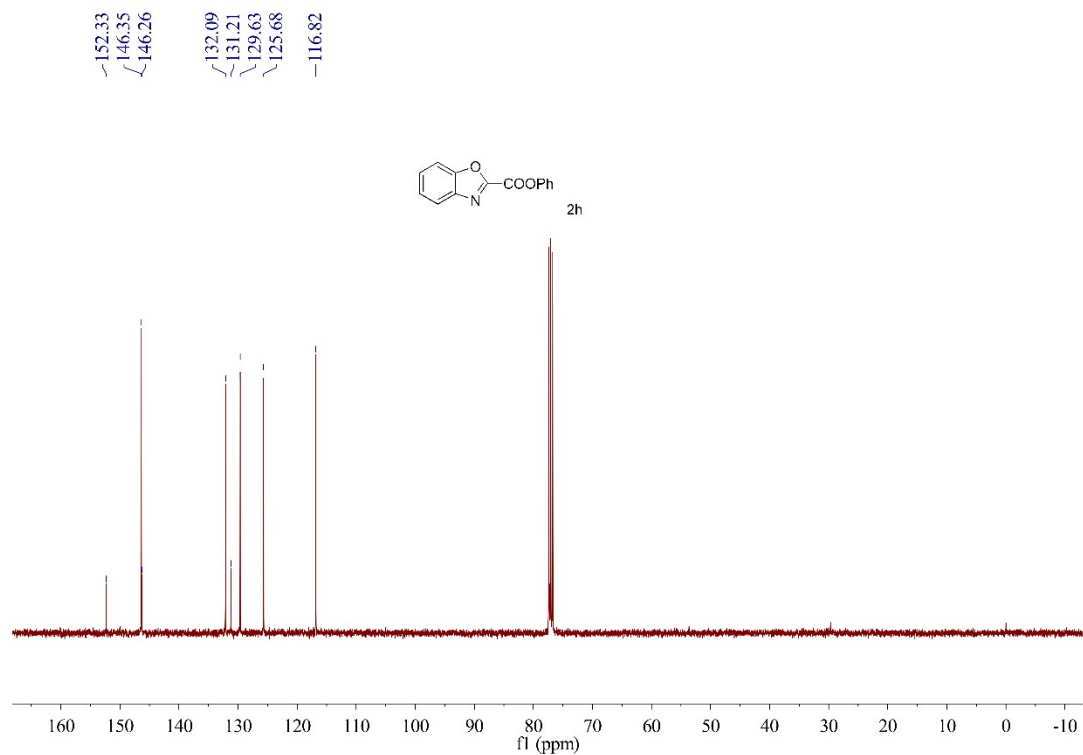

<sup>1</sup>H NMR Spectra of ethyl 6-methylbenzo[*d*]oxazole-2-carboxylate (**2i**)

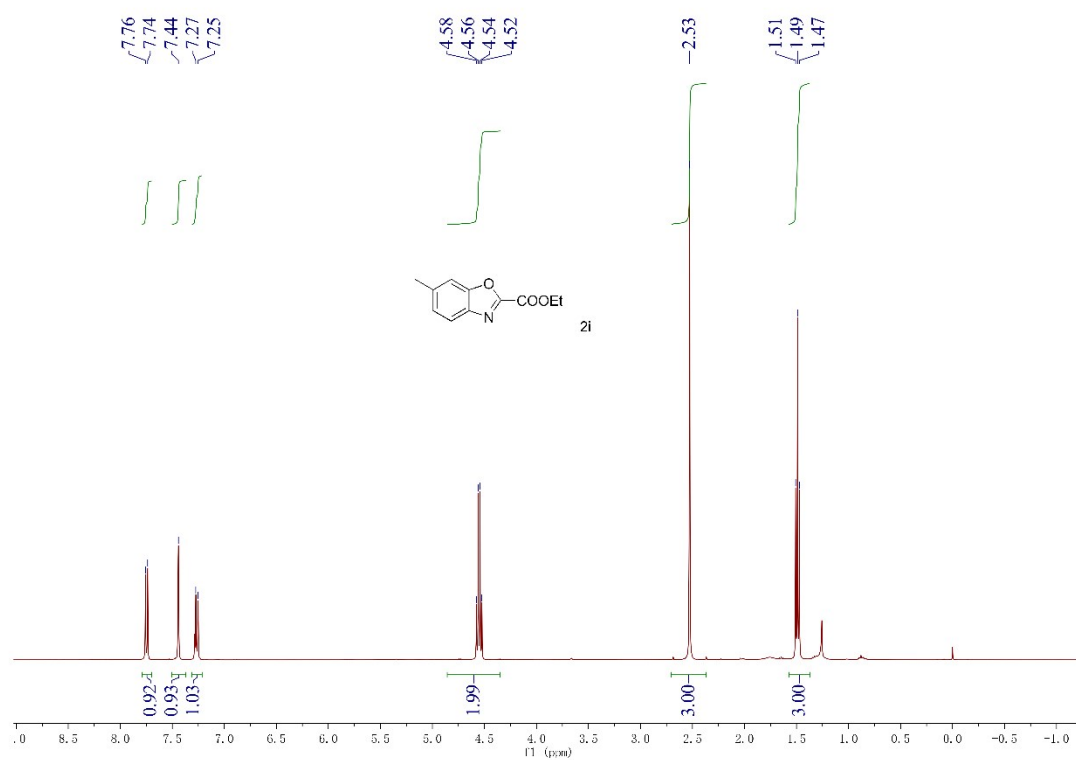

<sup>13</sup>C NMR Spectra of ethyl 6-methylbenzo[*d*]oxazole-2-carboxylate (**2i**)

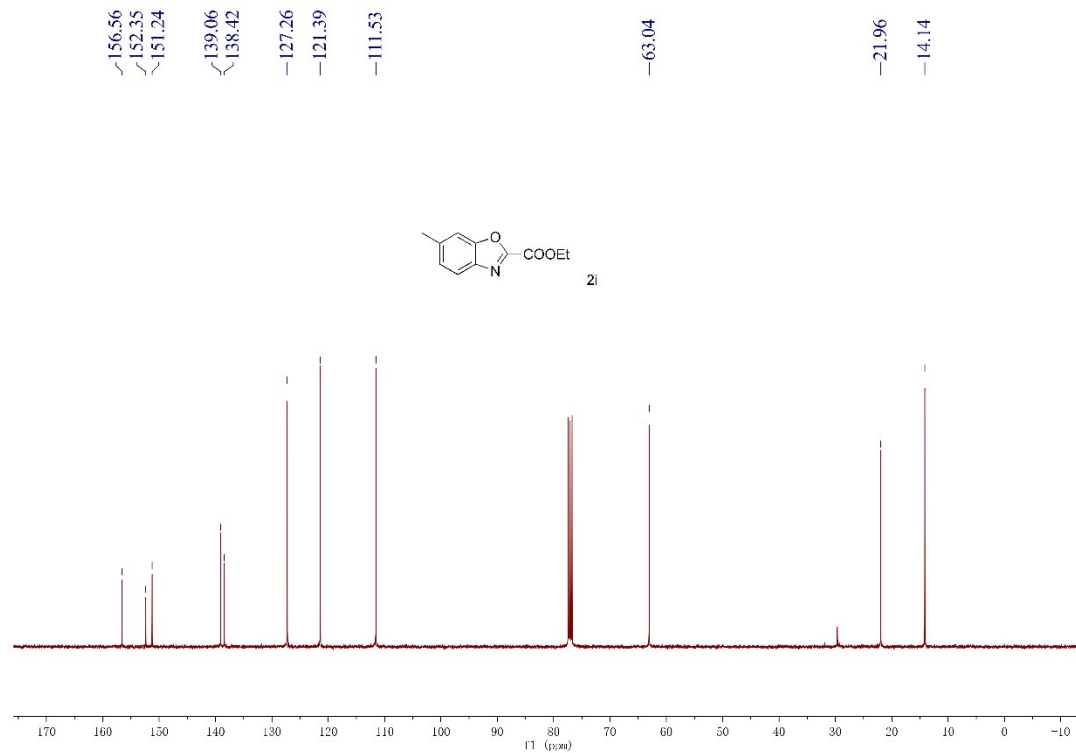

<sup>1</sup>H NMR Spectra of ethyl 6-chlorobenzo[*d*]oxazole-2-carboxylate (**2j**)

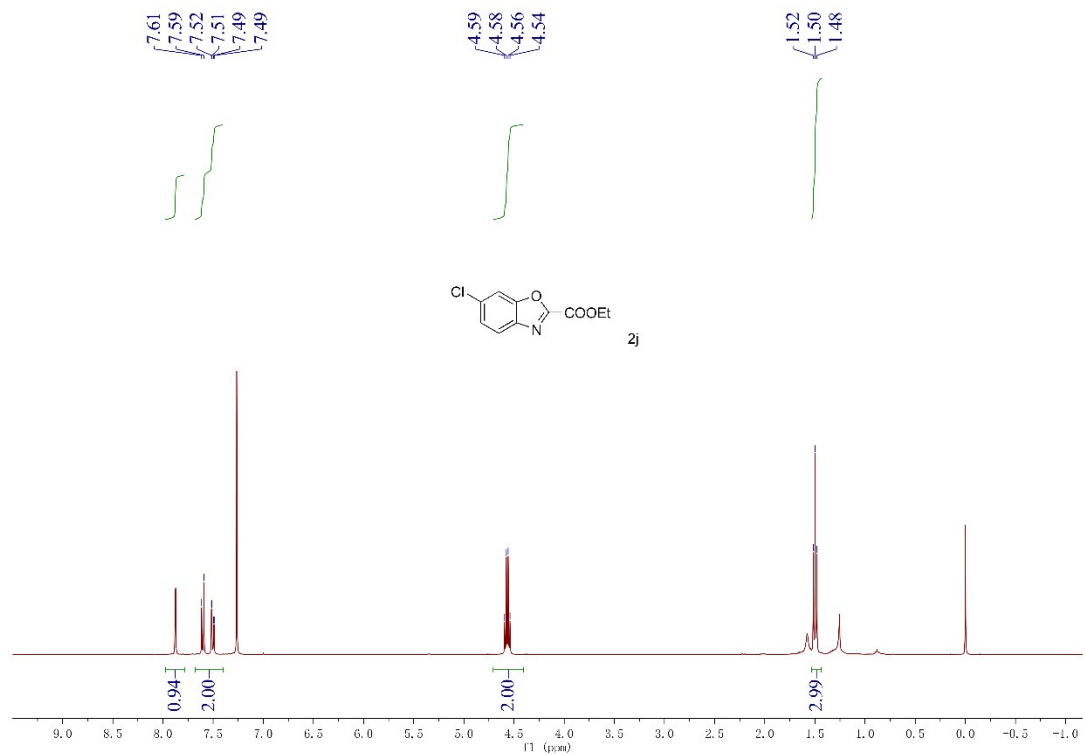

**<sup>13</sup>C NMR Spectra of ethyl 6-chlorobenzo[*d*]oxazole-2-carboxylate (2j)**

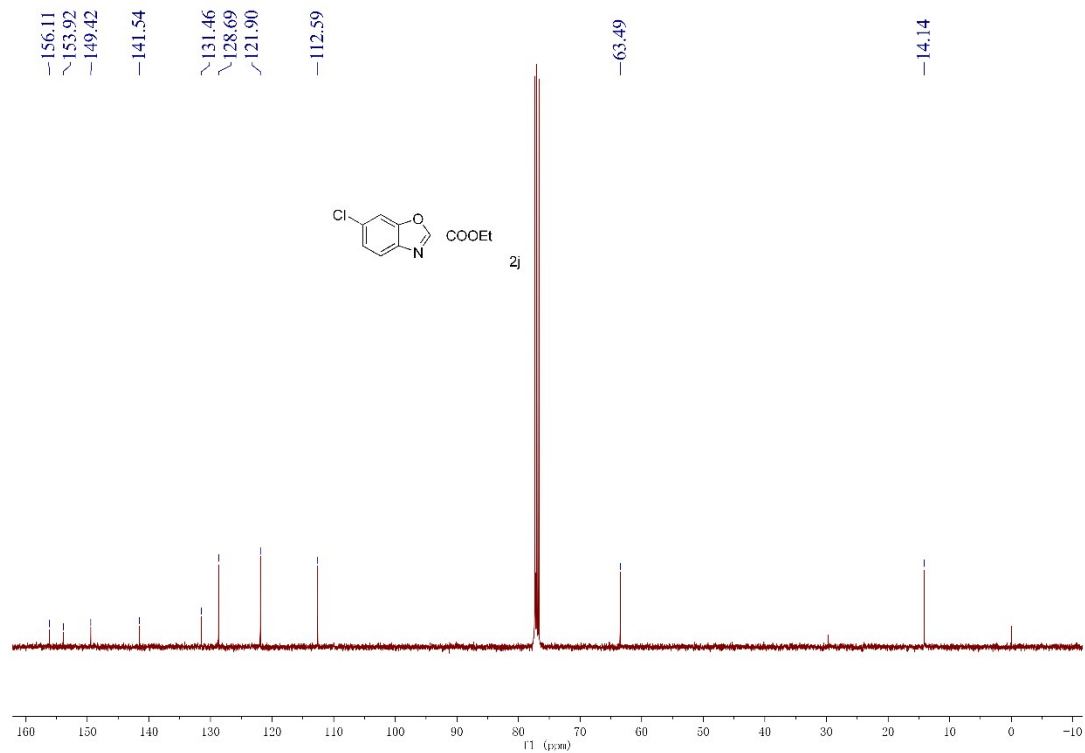

**<sup>1</sup>H NMR Spectra of ethyl 5-methylbenzo[*d*]oxazole-2-carboxylate (2k)**

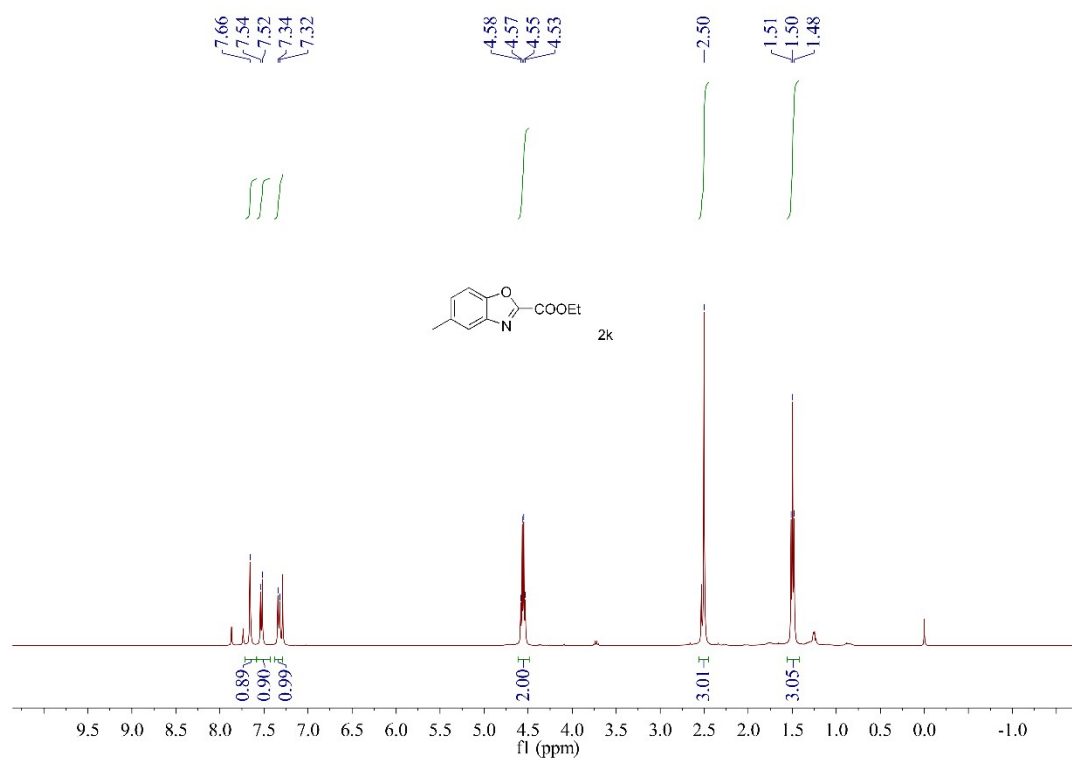

**<sup>13</sup>C NMR Spectra of ethyl 5-methylbenzo[*d*]oxazole-2-carboxylate (2k)**

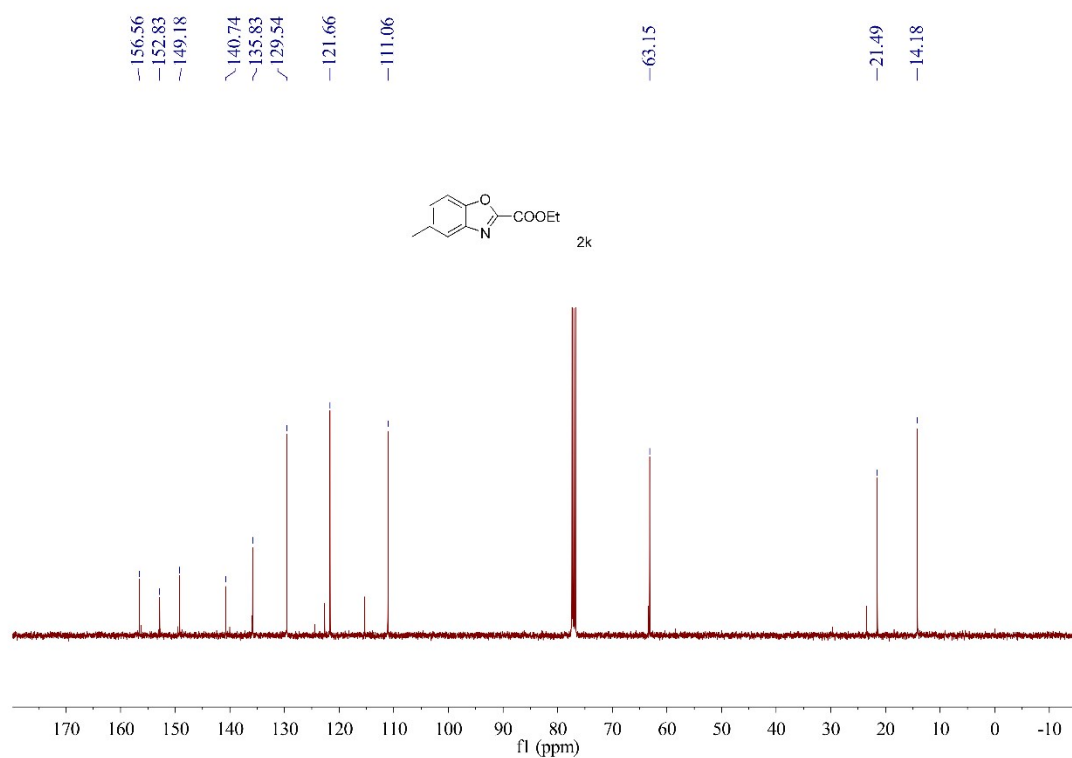

**<sup>1</sup>H NMR Spectra of ethyl 5-(trifluoromethyl)benzo[*d*]oxazole-2-carboxylate (2l)**

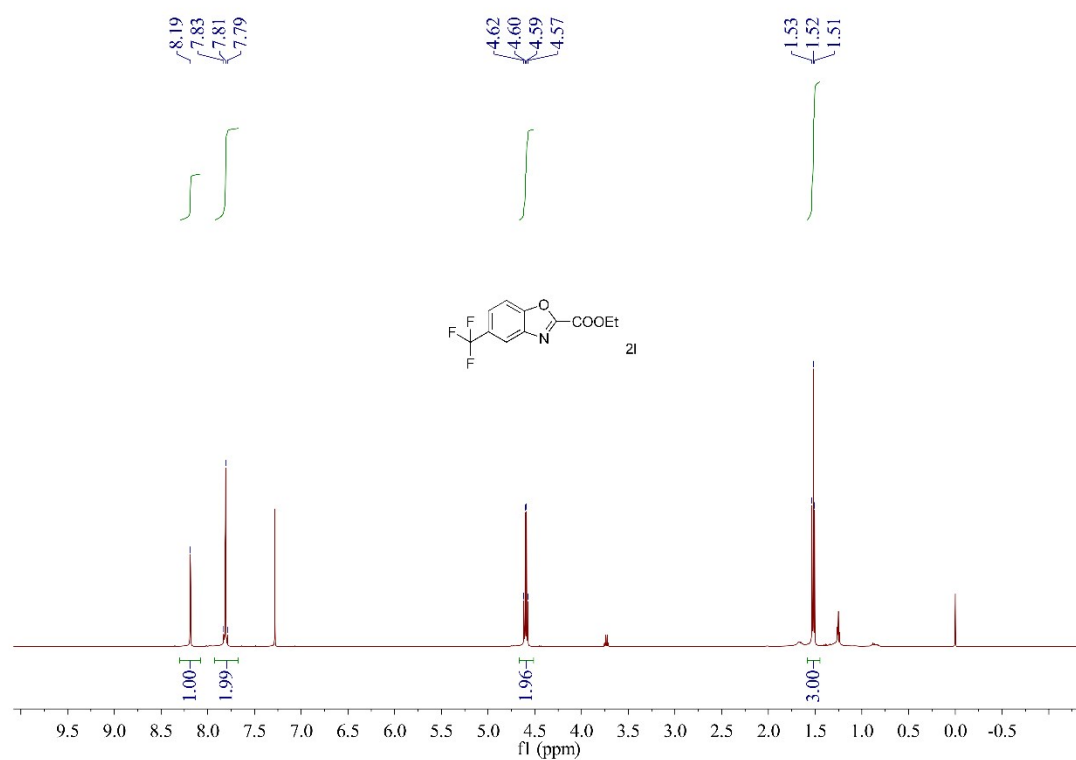

<sup>13</sup>C NMR Spectra of ethyl 5-(trifluoromethyl)benzo[d]oxazole-2-carboxylate (2l)

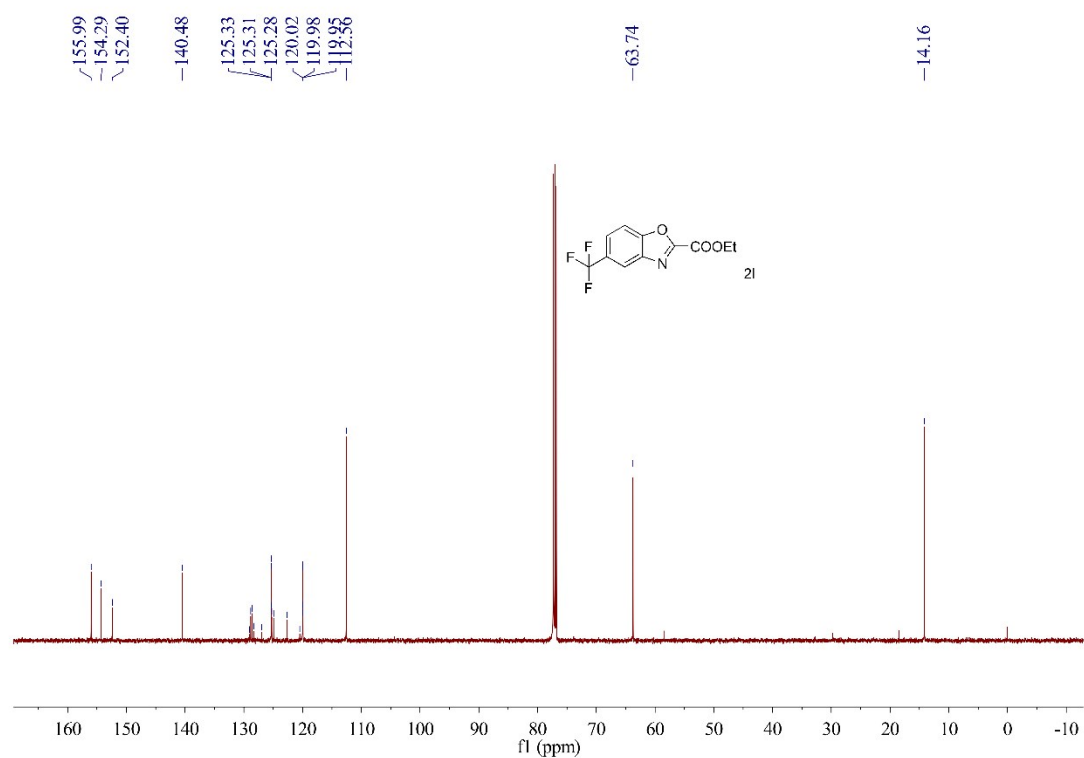

<sup>1</sup>H NMR Spectra of Benzo[d]oxazol-2-yl(phenyl)methanone (2m)

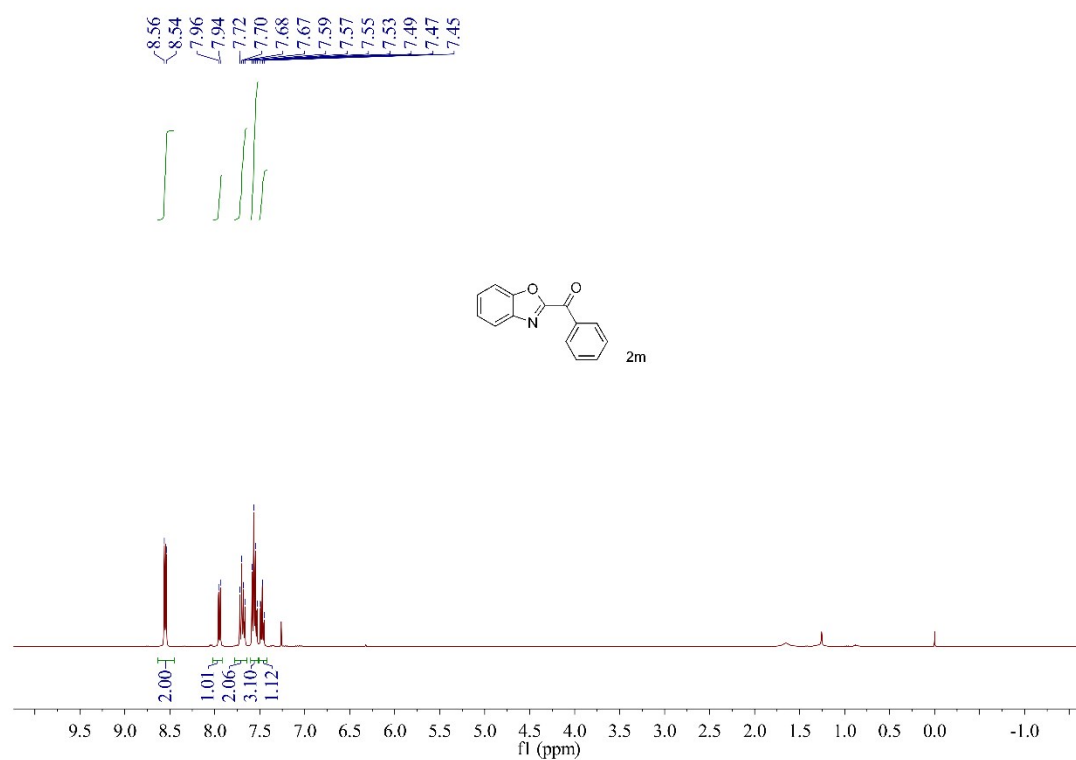

<sup>13</sup>C NMR Spectra of Benzo[*d*]oxazol-2-yl(phenyl)methanone (**2m**)

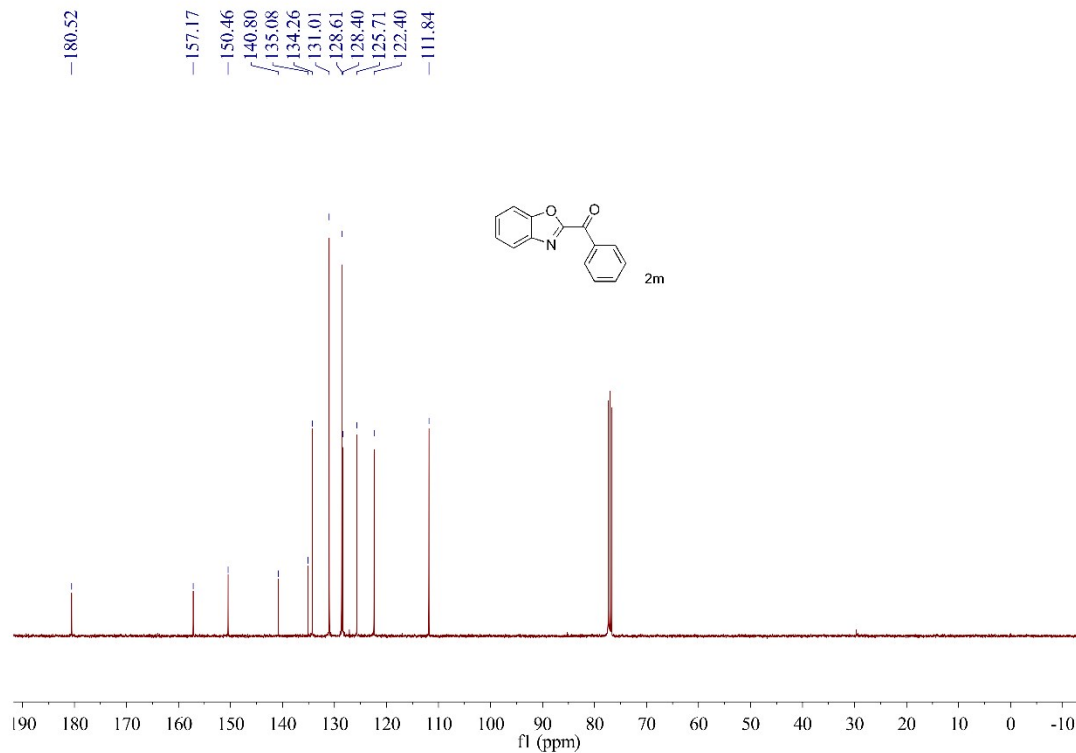

<sup>1</sup>H NMR Spectra of *N*-methylbenzo[*d*]oxazole-2-carboxamide (**2n**)

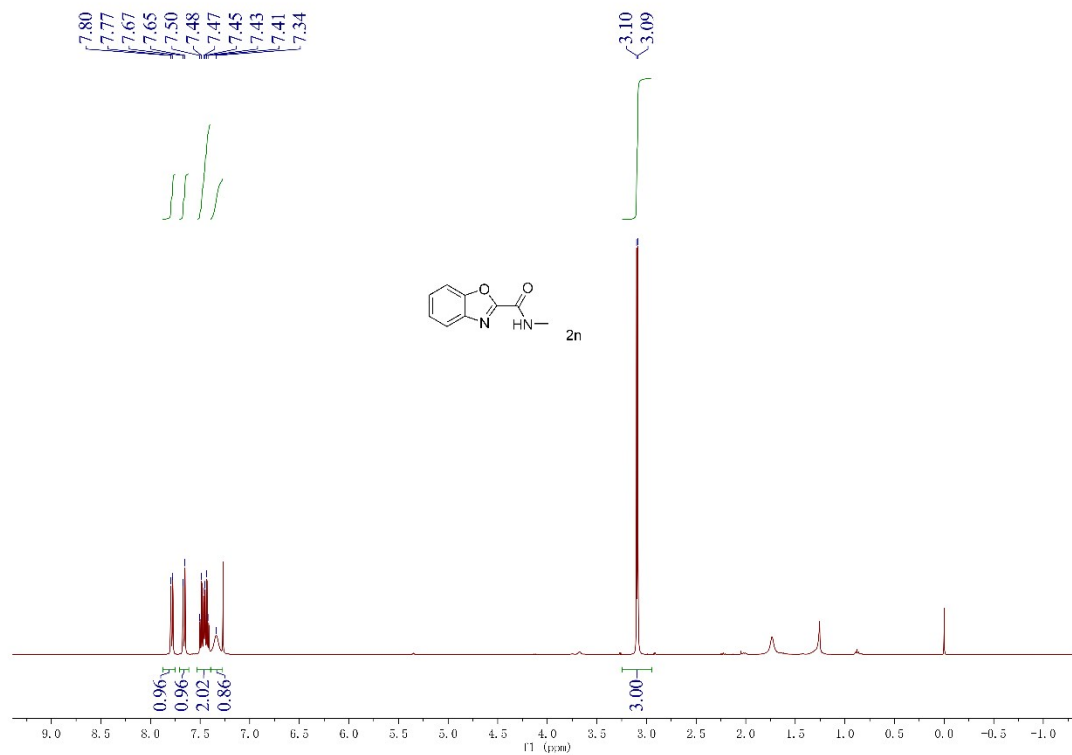

**<sup>13</sup>C NMR Spectra of *N*-methylbenzo[*d*]oxazole-2-carboxamide (2n)**

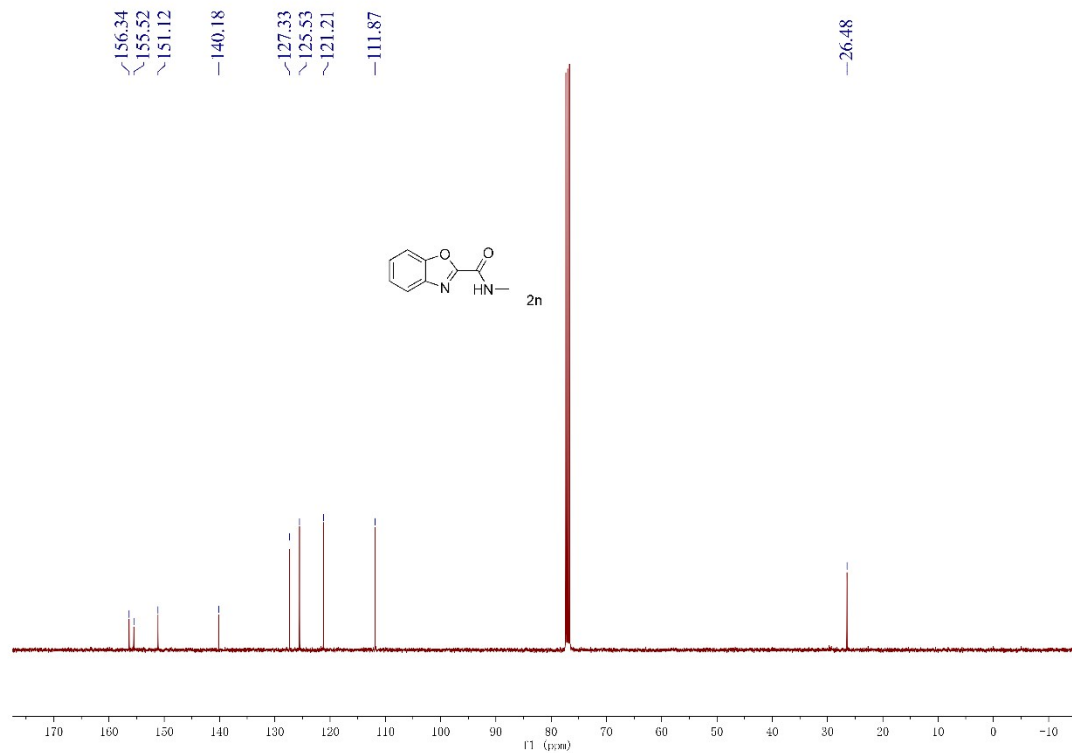

**<sup>1</sup>H NMR Spectra of *N*-ethylbenzo[*d*]oxazole-2-carboxamide (2o)**



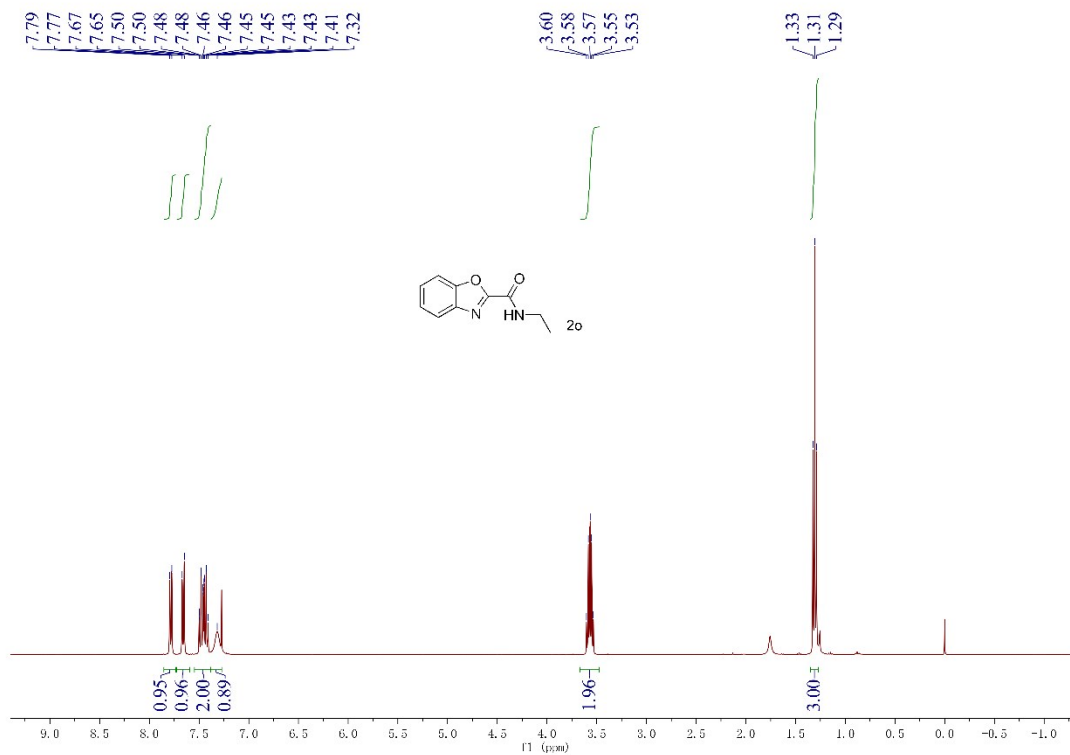

**<sup>13</sup>C NMR Spectra of *N*-ethylbenzo[*d*]oxazole-2-carboxamide (**2o**)**

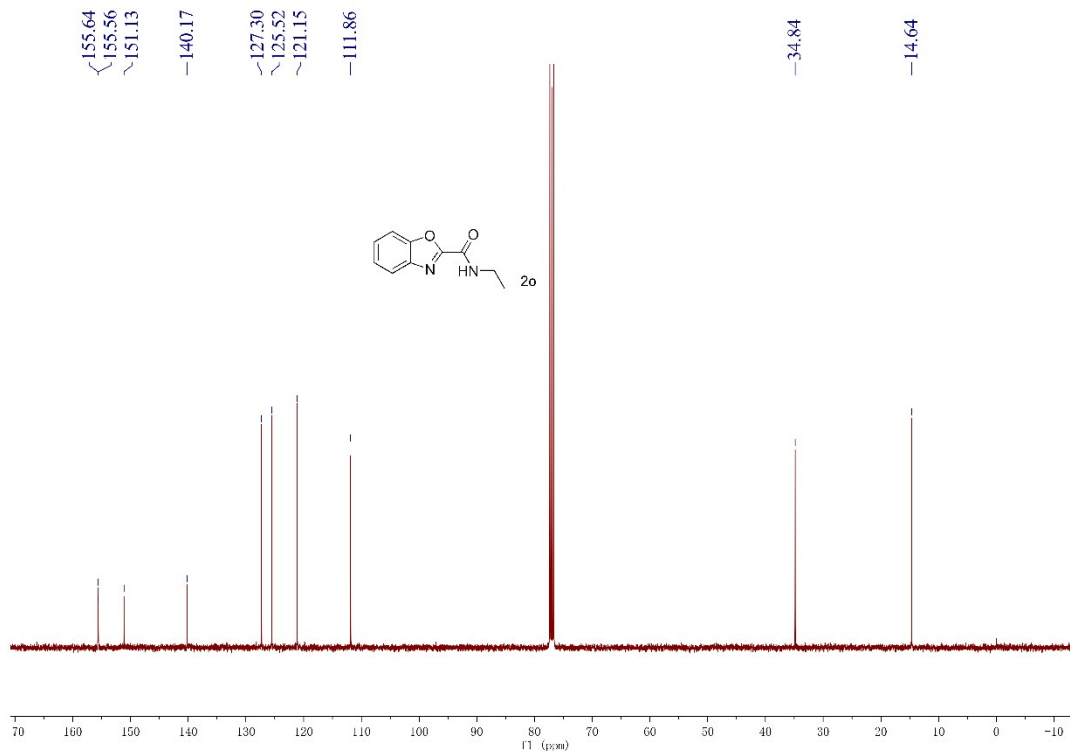

**<sup>1</sup>H NMR Spectra of *N,N*-dimethylbenzo[*d*]oxazole-2-carboxamide (**2p**)**

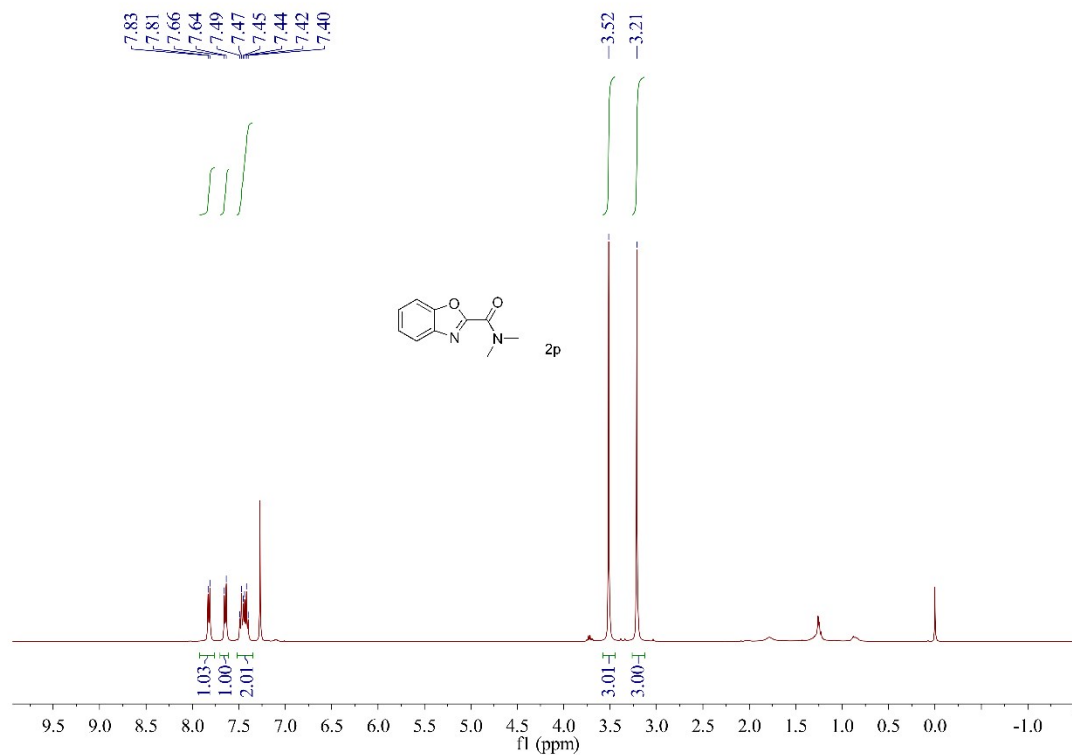

<sup>13</sup>C NMR Spectra of *N,N*-dimethylbenzo[*d*]oxazole-2-carboxamide (**2p**)

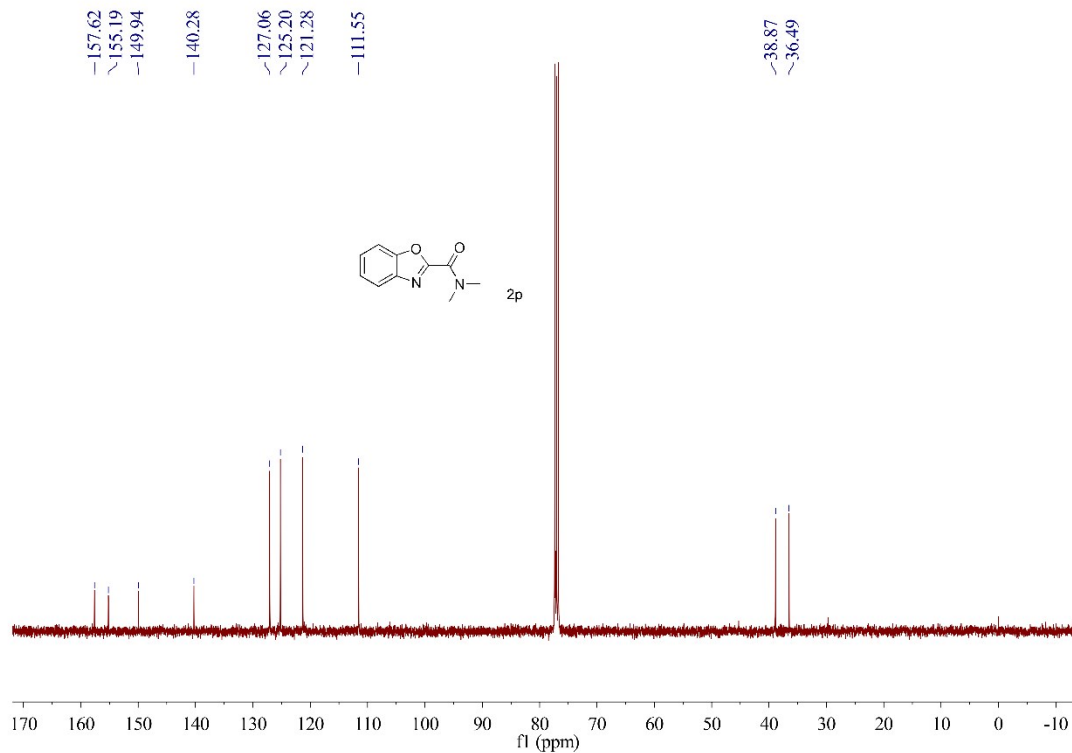

<sup>1</sup>H NMR Spectra of *N*-benzylbenzo[*d*]oxazole-2-carboxamide (**2q**)

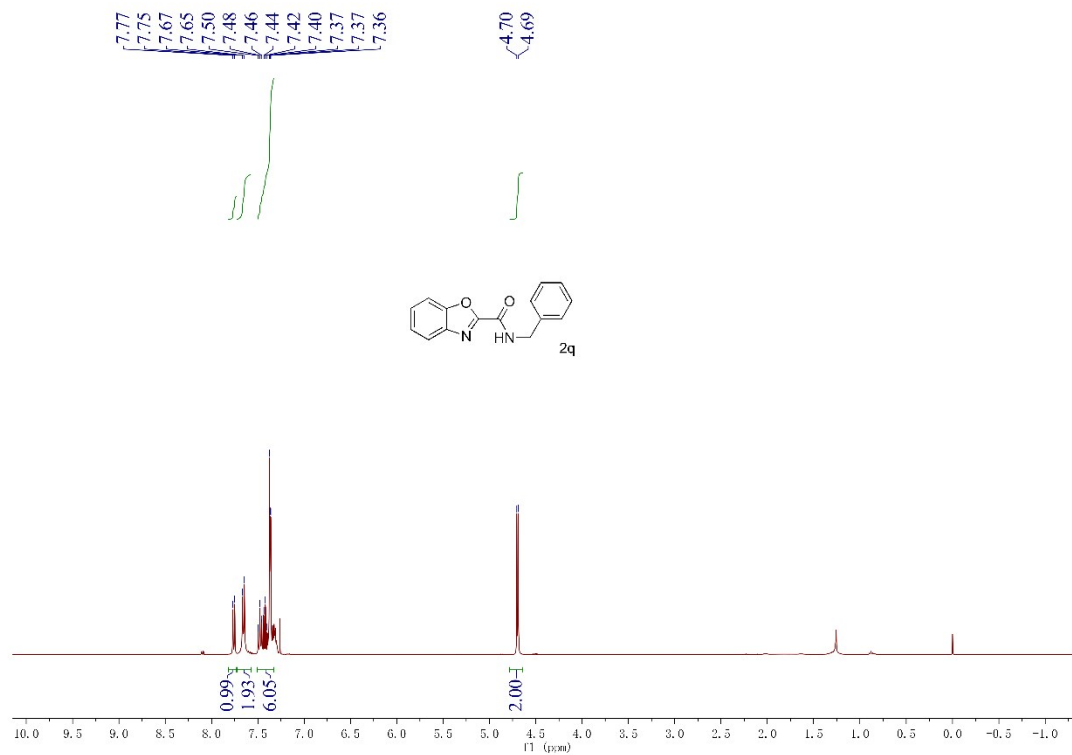

<sup>13</sup>C NMR Spectra of *N*-benzylbenzo[*d*]oxazole-2-carboxamide (**2q**)

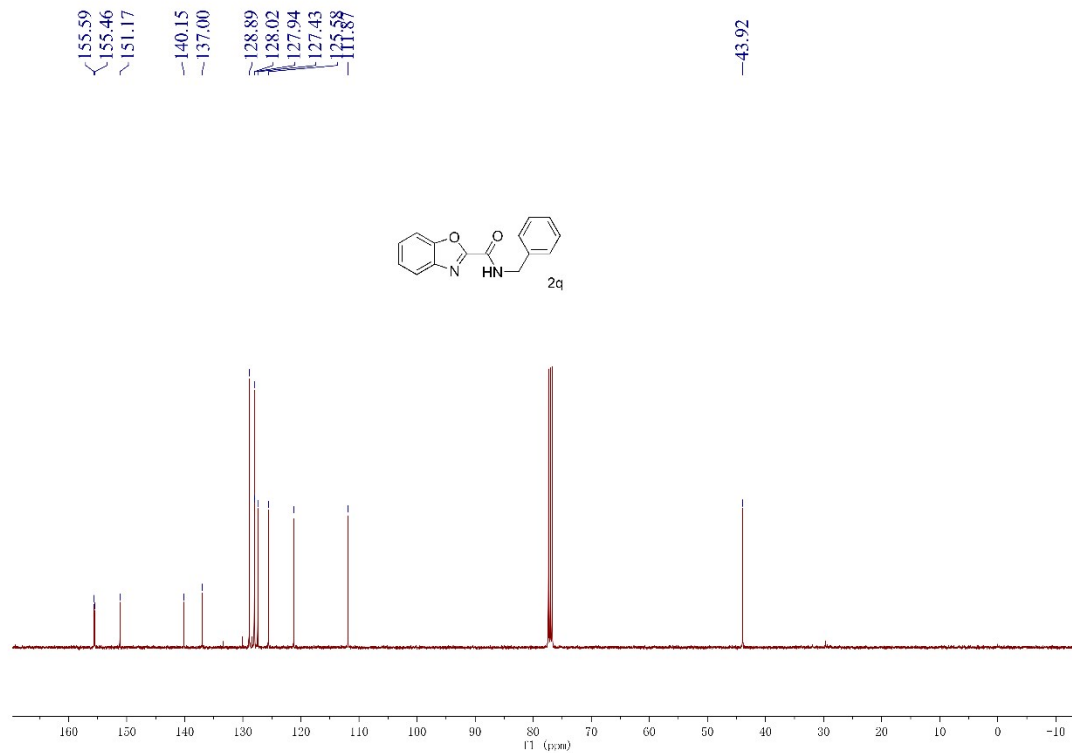

<sup>1</sup>H NMR Spectra of ethyl (benzo[*d*]oxazole-2-carbonyl)glycinate (**2r**)

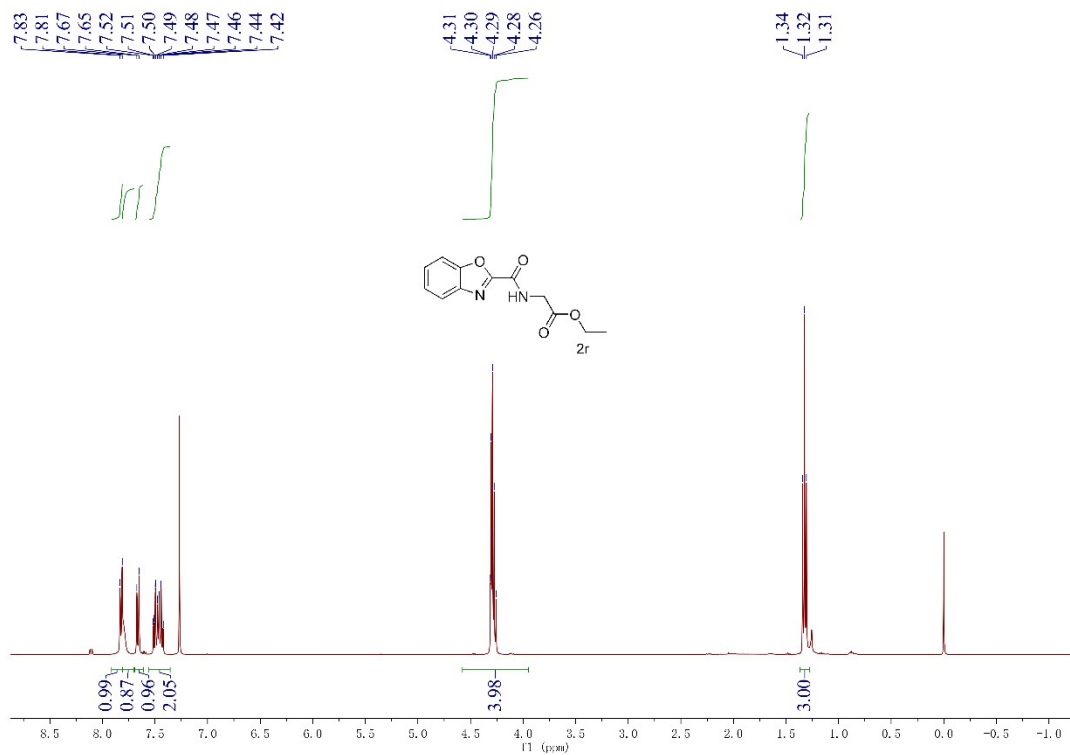

**<sup>13</sup>C NMR Spectra of ethyl (benzo[*d*]oxazole-2-carbonyl)glycinate (2r)**

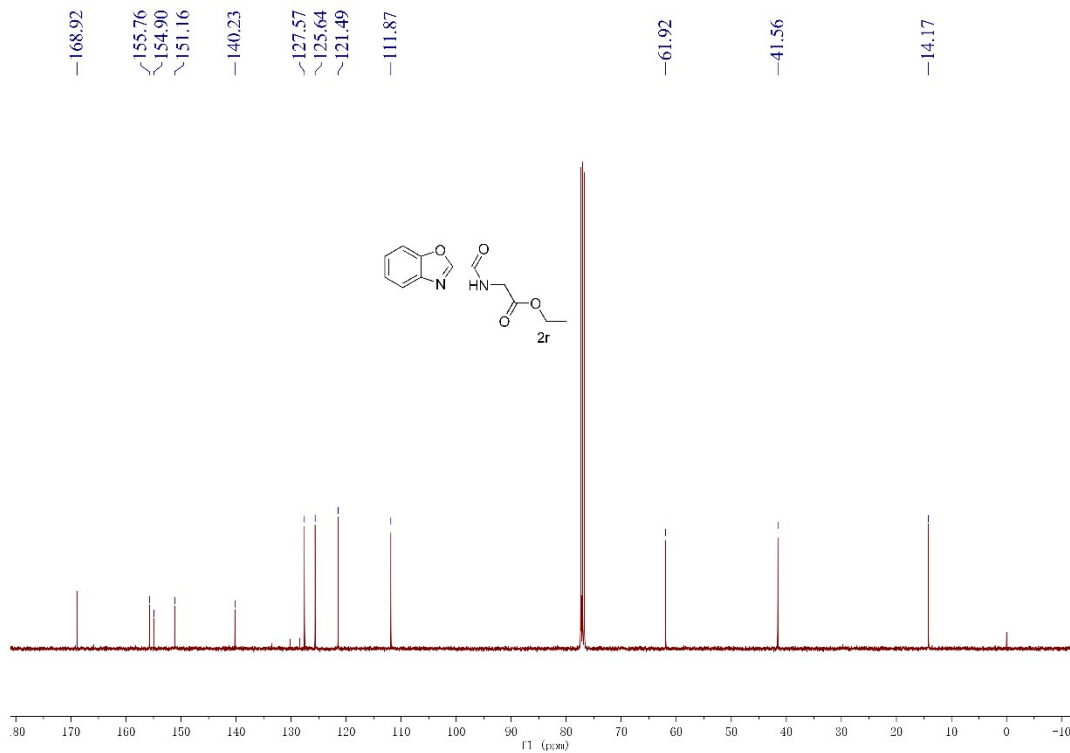

**<sup>1</sup>H NMR Spectra of ethyl (benzo[*d*]oxazole-2-carbonyl)valinate (2s)**

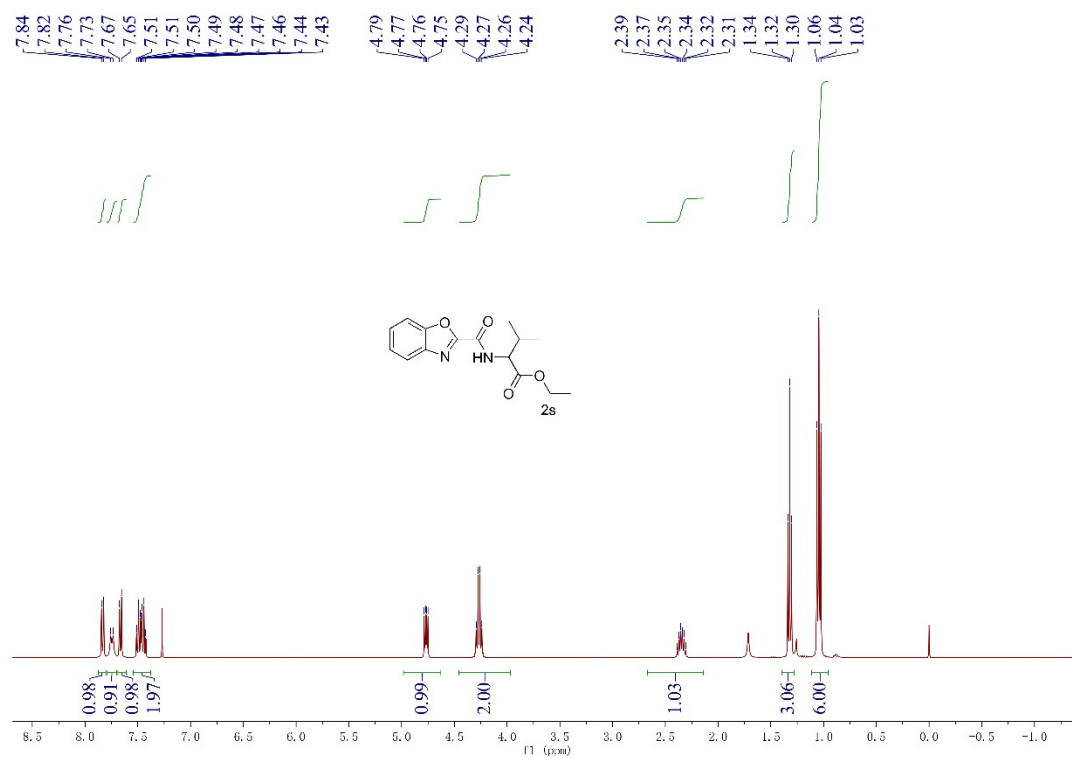

**<sup>13</sup>C NMR Spectra of ethyl (benzo[*d*]oxazole-2-carbonyl)valinate (2s)**

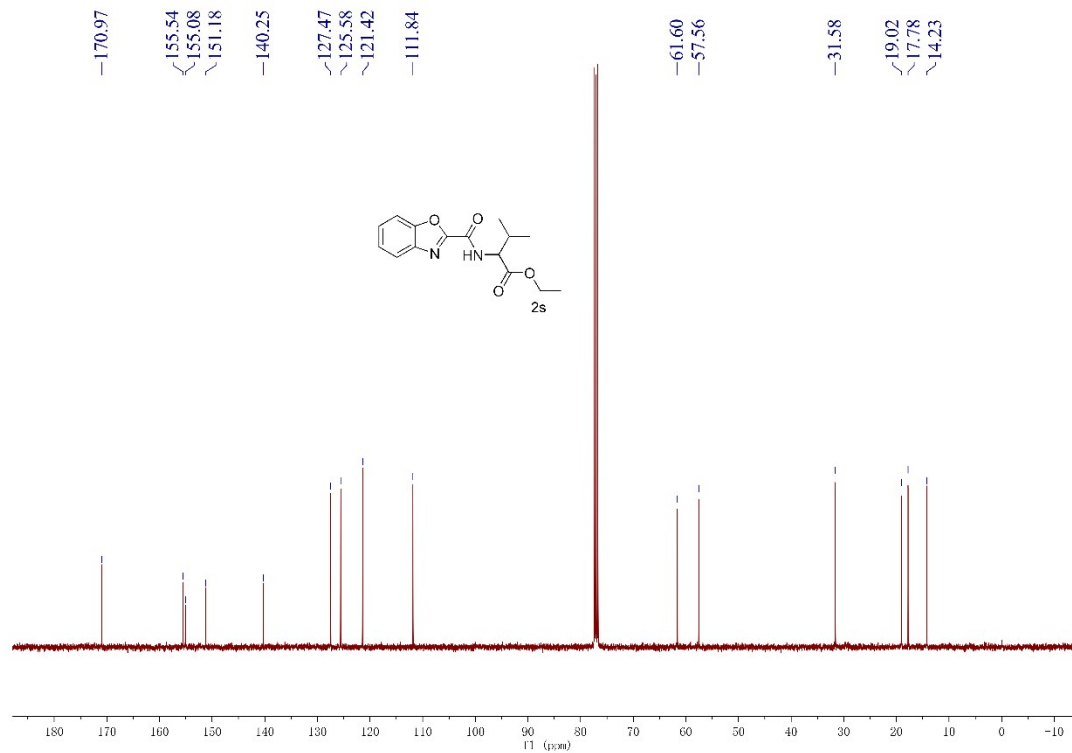

**<sup>1</sup>H NMR Spectra of methyl (benzo[*d*]oxazole-2-carbonyl)phenylalaninate (2t)**

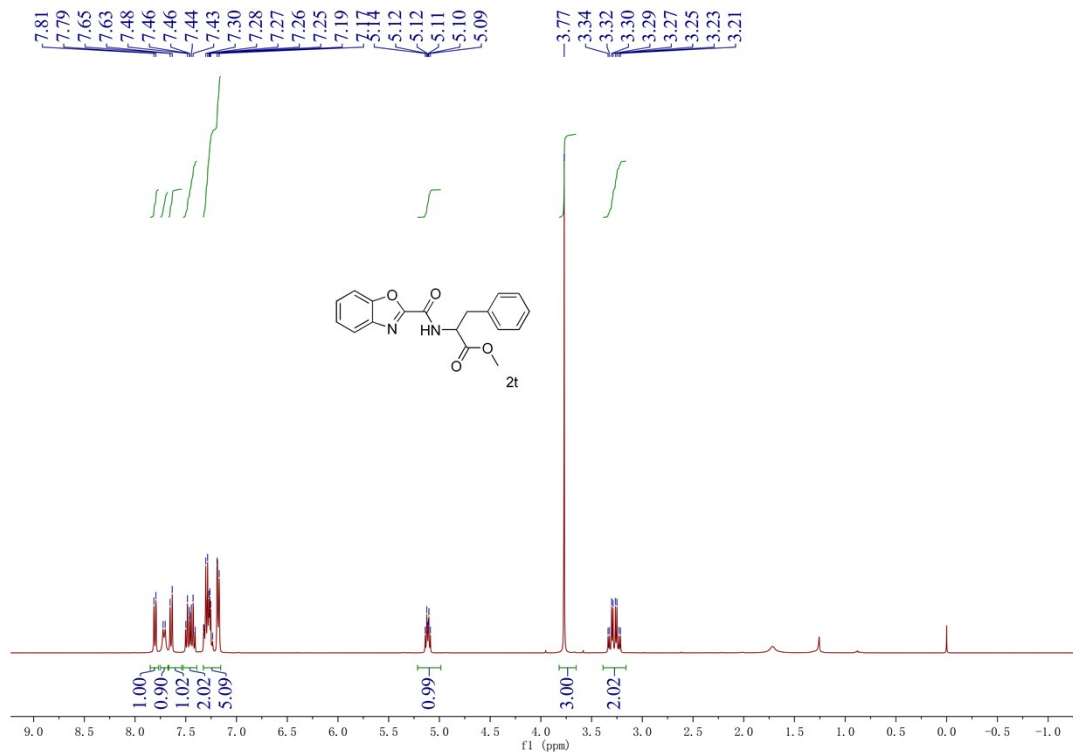

**<sup>13</sup>C NMR Spectra of methyl (benzo[d]oxazole-2-carbonyl)phenylalaninate (2t)**

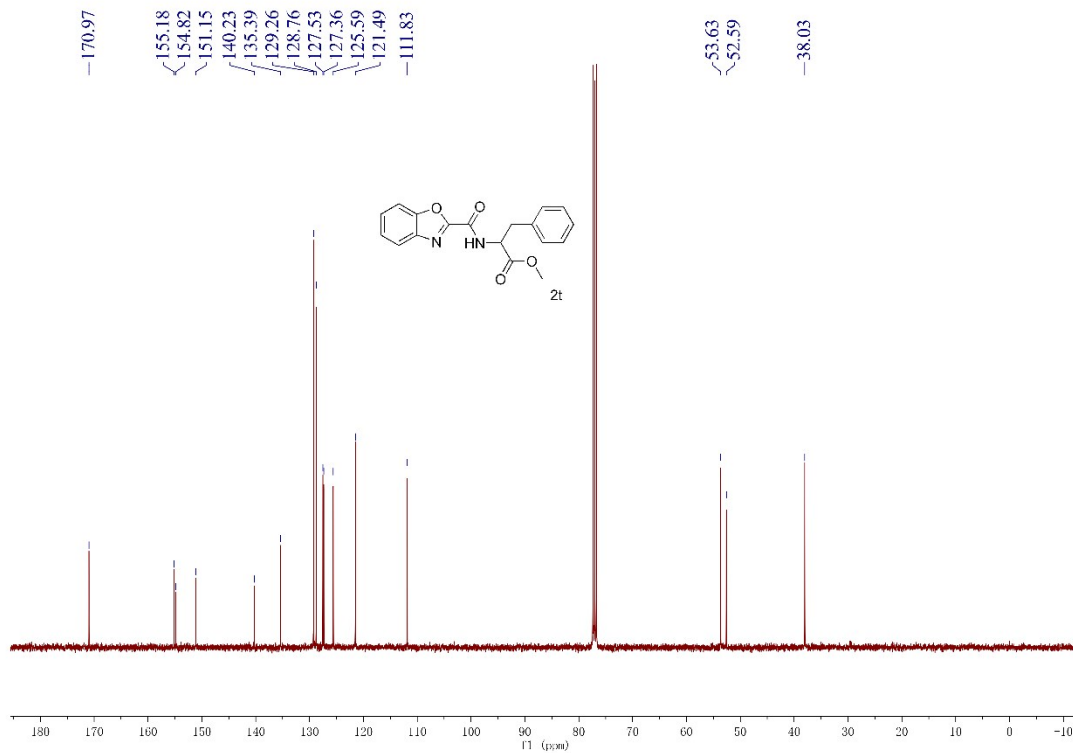

Supplement: d0ob02490b1.pdf [file d0ob02490b1.pdf]
